# Supplementary material for: Prevalence, imaging patterns and risk factors of interstitial lung disease in connective tissue disease: a systematic review and meta-analysis
Source: PubMed Central journal article supplement — Eur Respir Rev. 2023 Mar 8;32(167):220210. doi: 10.1183/16000617.0210-2022 (PMC10032591; doi:10.1183/16000617.0210-2022), 2023-03-08
Supplement: ERR-0210-2022.SUPPLEMENT.pdf [file ERR-0210-2022.SUPPLEMENT.pdf]

**Supplement to: Prevalence, imaging patterns, and risk factors of interstitial lung disease in connective tissue disease: a systematic review and meta-analysis**

Greta M. Joy, Omri A. Arbiv, Carmen K. Wong, Stacey D. Lok, Nicola A. Adderley, Krzysztof M. Dobosz, Kerri A. Johannson, Christopher J. Ryerson

## TABLE OF CONTENTS

|                                                                                                                                                                                                                                            |    |
|--------------------------------------------------------------------------------------------------------------------------------------------------------------------------------------------------------------------------------------------|----|
| <b>SUPPLEMENTAL FIGURES</b> .....                                                                                                                                                                                                          | 3  |
| Figure S1a Prevalence of RA-ILD, study level data.....                                                                                                                                                                                     | 3  |
| Figure S1b Prevalence of SSc-ILD, study level data.....                                                                                                                                                                                    | 4  |
| Figure S1c Prevalence of IIM-ILD, study level data.....                                                                                                                                                                                    | 5  |
| Figure S1d Prevalence of pSS-ILD, study level data.....                                                                                                                                                                                    | 6  |
| Figure S1e Prevalence of MCTD-ILD, study level data.....                                                                                                                                                                                   | 7  |
| Figure S1f Prevalence of SLE-ILD, study level data.....                                                                                                                                                                                    | 8  |
| Figure S2a Study level data on RA-ILD CT patterns.....                                                                                                                                                                                     | 9  |
| Figure S2b Study level data on SSc-ILD CT patterns.....                                                                                                                                                                                    | 10 |
| Figure S2c Study level data on IIM-ILD CT patterns.....                                                                                                                                                                                    | 11 |
| Figure S2d Study level data on pSS-ILD CT patterns.....                                                                                                                                                                                    | 12 |
| Figure S2e Study level data on MCTD-ILD CT patterns.....                                                                                                                                                                                   | 13 |
| Figure S2f Study level data on SLE-ILD CT patterns.....                                                                                                                                                                                    | 14 |
| Figure S2f Study level data on UCTD-ILD CT patterns.....                                                                                                                                                                                   | 15 |
| <b>SUPPLEMENTAL TABLES</b> .....                                                                                                                                                                                                           | 16 |
| Table S1a Embase search strategy.....                                                                                                                                                                                                      | 16 |
| Table S1b Medline search strategy.....                                                                                                                                                                                                     | 16 |
| Table S2 Number of studies and total sample size addressing each objective. Data are reported as number of studies (included conference abstracts), N = total number of patients. ....                                                     | 18 |
| Table S3a Characteristics of studies addressing prevalence of RA-ILD, distribution of CT patterns of RA-ILD, and risk factors for development of RA-ILD.....                                                                               | 19 |
| Table S3b Characteristics of studies addressing prevalence of SSc-ILD, distribution of CT patterns of SSc-ILD, and risk factors for development of SSc-ILD. No studies address risk factors for specific CT patterns. ....                 | 20 |
| Table S3c Characteristics of studies addressing prevalence of IIM-ILD, distribution of CT patterns of IIM-ILD, and risk factors for development of IIM-ILD.....                                                                            | 21 |
| Table S3d Characteristics of studies addressing prevalence of pSS-ILD, distribution of CT patterns of pSS-ILD, and risk factors for development of pSS-ILD. ....                                                                           | 22 |
| Table S3e Characteristics of studies addressing prevalence of SLE-ILD, distribution of CT patterns of SLE-ILD, and risk factors for development of SLE-ILD. No studies addressed CT pattern risk factors.....                              | 23 |
| Table S3f Characteristics of studies addressing prevalence of MCTD-ILD, distribution of CT patterns of MCTD-ILD, and risk factors for development of MCTD-ILD. No studies addressed risk factors for specific CT patterns. ....            | 24 |
| Table S3g Characteristics of studies addressing prevalence of UCTD-ILD, distribution of CT patterns of UCTD-ILD, and risk factors for development of UCTD-ILD. No studies addressed prevalence of ILD or risk factors for ILD in UCTD..... | 25 |
| Table S4 List of references, study characteristics, and quality of evidence.....                                                                                                                                                           | 26 |
| Table S5 Pooled prevalence of ILD CT patterns, by connective tissue disease. Data shown are pooled percent (95% confidence interval). Heterogeneity is displayed as I <sup>2</sup> statistic and p value. ....                             | 68 |

# SUPPLEMENTAL FIGURES

Figure S1a Prevalence of RA-ILD, study level data

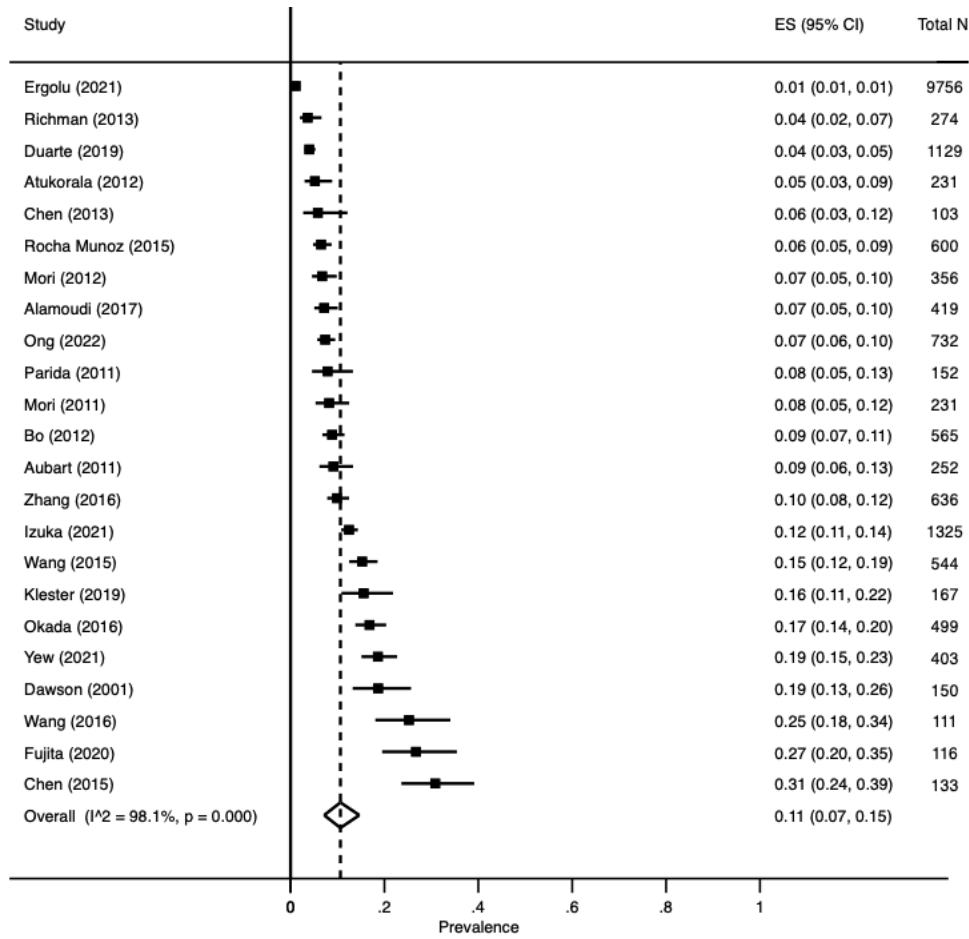

Abbreviations: ILD: interstitial lung disease, RA: rheumatoid arthritis

**Figure S1b** Prevalence of SSc-ILD, study level data

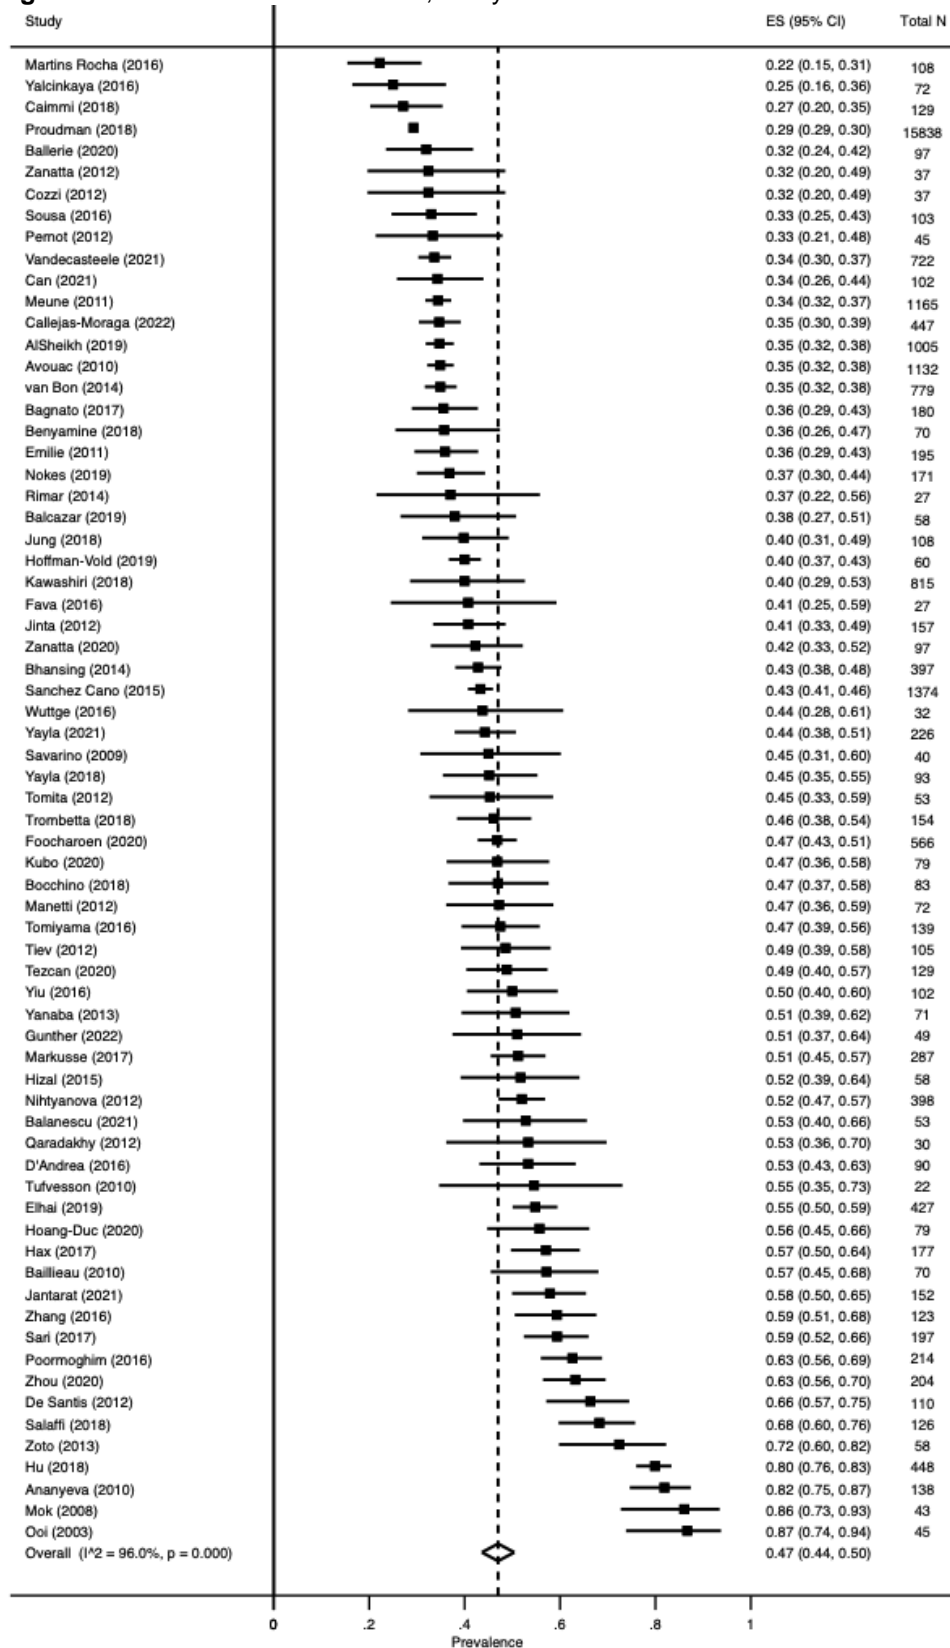

Abbreviations: ILD: interstitial lung disease, SSc: systemic sclerosis

**Figure S1c** Prevalence of IIM-ILD, study level data

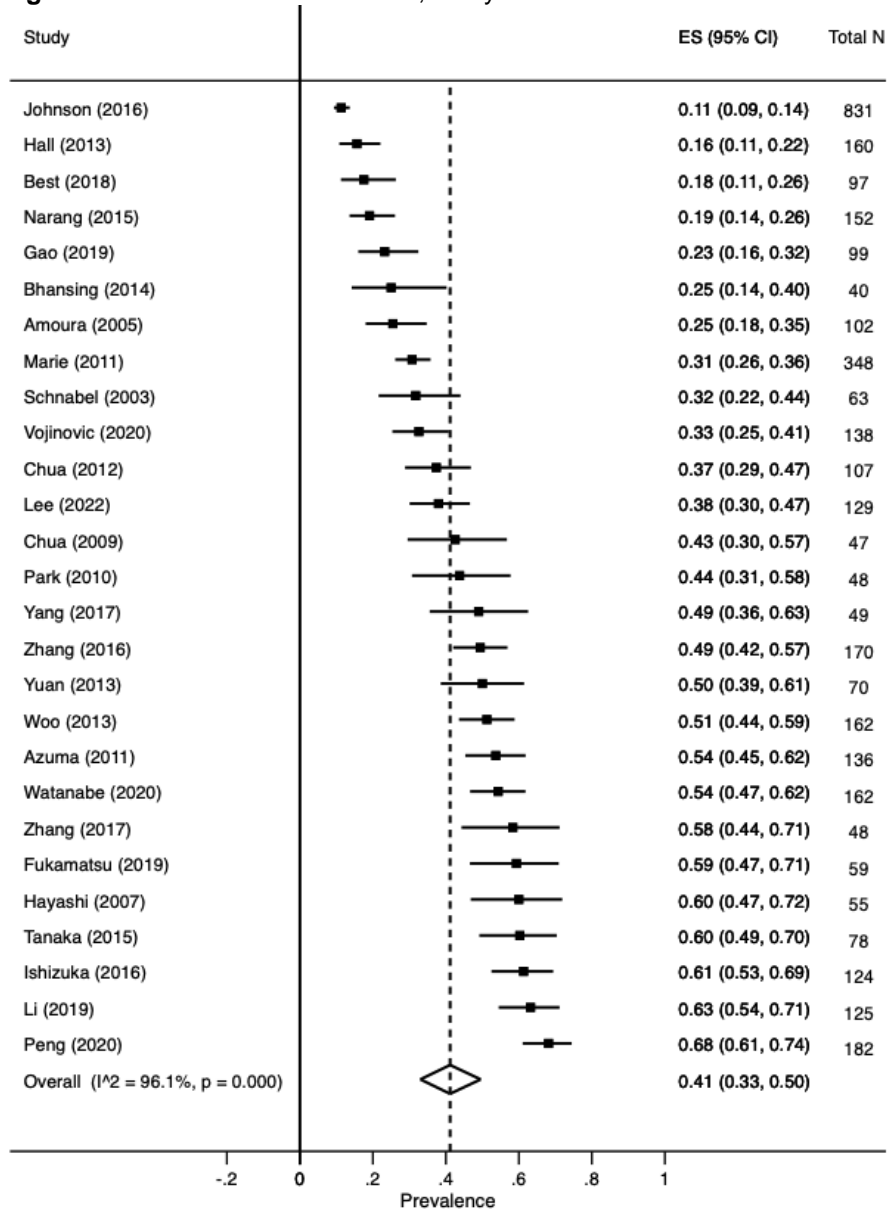

Abbreviations: IIM: idiopathic inflammatory myositis, ILD: interstitial lung disease

**Figure S1d** Prevalence of pSS-ILD, study level data

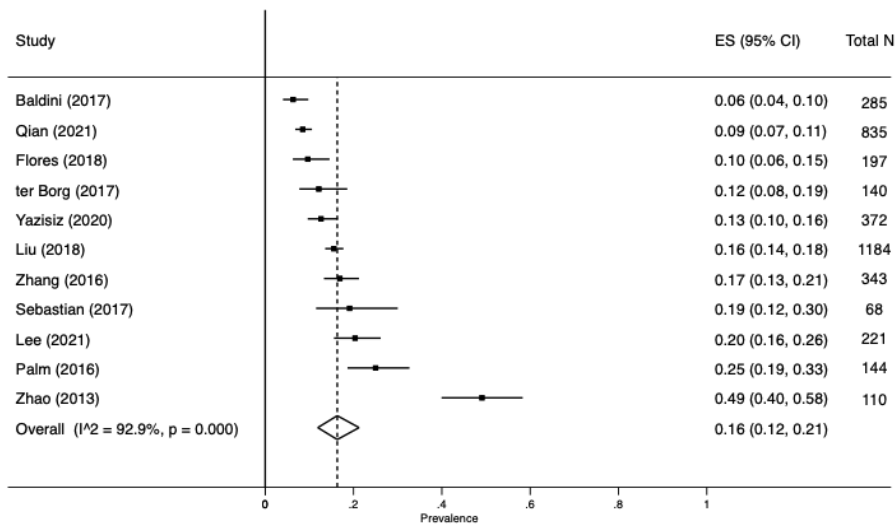

Abbreviations: ILD: interstitial lung disease, pSS: primary Sjögren syndrome

**Figure S1e** Prevalence of MCTD-ILD, study level data

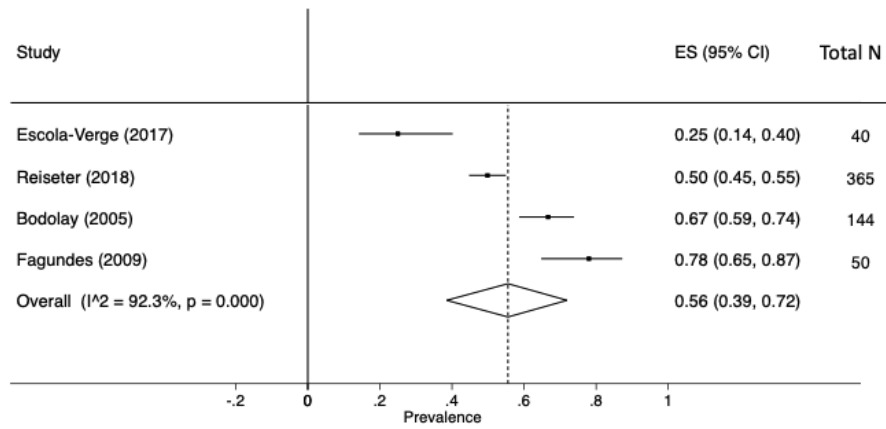

Abbreviations: ILD: interstitial lung disease, MCTD: mixed connective tissue disease

**Figure S1f** Prevalence of SLE-ILD, study level data

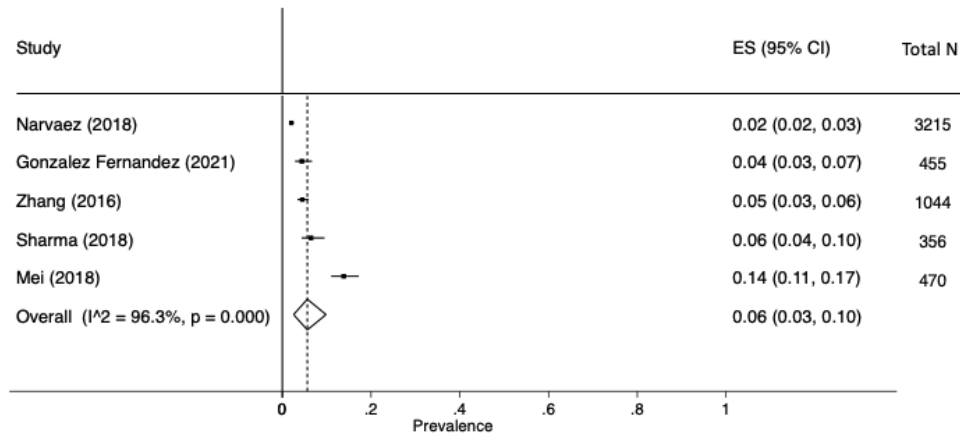

Abbreviations: ILD: interstitial lung disease, SLE: systemic lupus erythematosus



**Figure S2a** Study level data on RA-ILD CT patterns

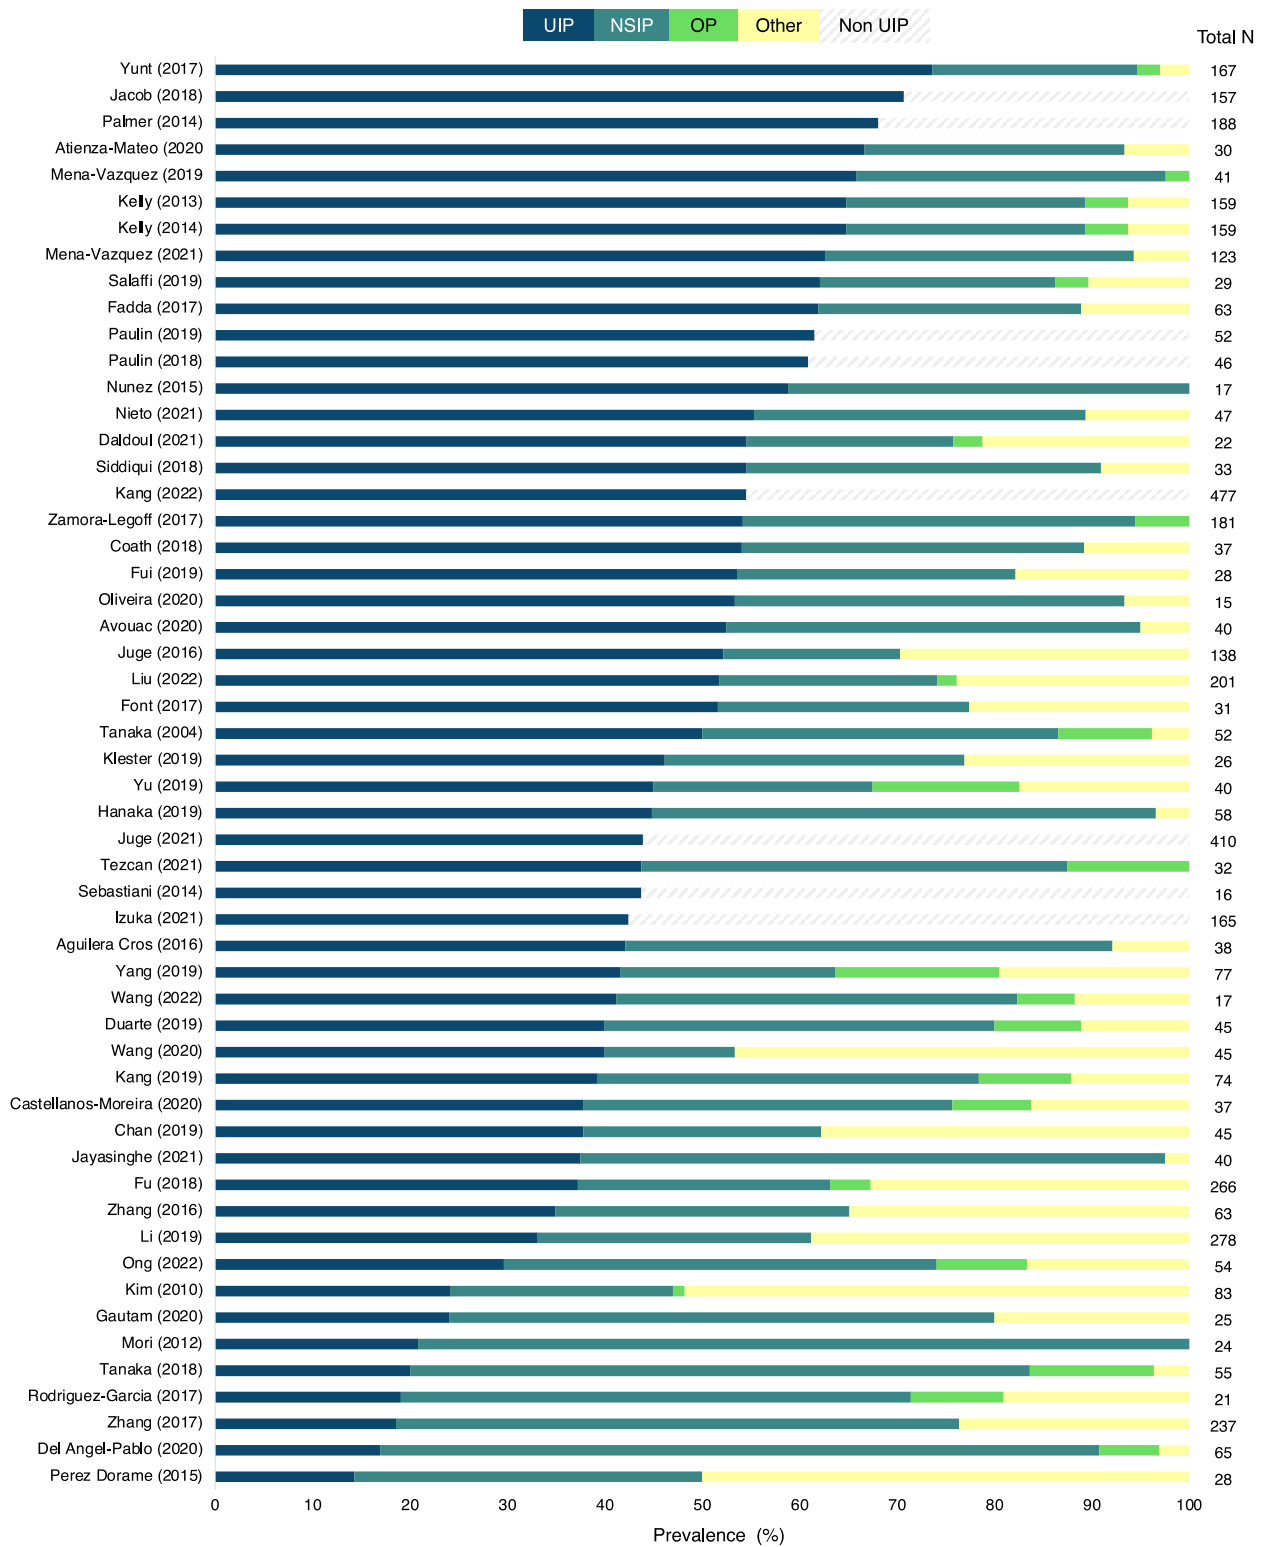

Abbreviations: CT: computed tomography, ILD: interstitial lung disease, NSIP: non-specific interstitial pneumonia, OP: organizing pneumonia, other: other and undifferentiated, RA: rheumatoid arthritis, UIP: usual interstitial pneumonia.

**Figure S2b** Study level data on SSc-ILD CT patterns

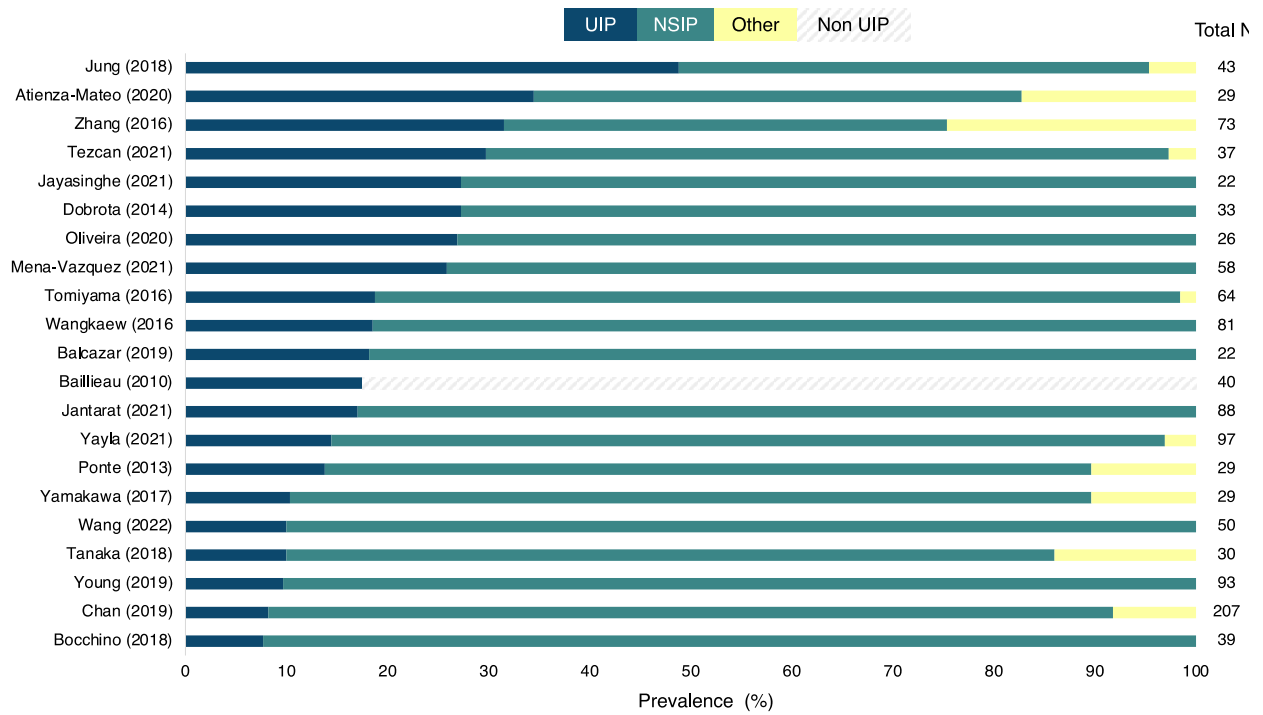

Abbreviations: CT: computed tomography, ILD: interstitial lung disease, NSIP: non-specific interstitial pneumonia, other: other and undifferentiated, SSc: systemic sclerosis, UIP: usual interstitial pneumonia.

**Figure S2c** Study level data on IIM-ILD CT patterns

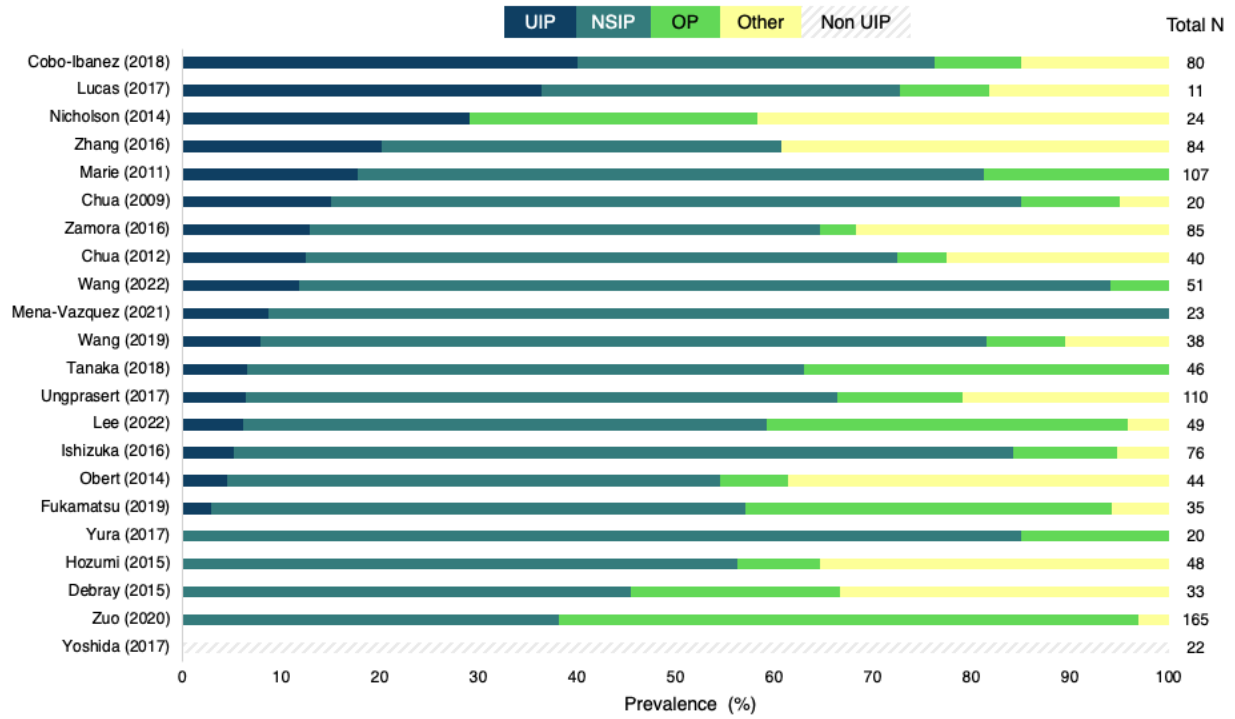

Abbreviations: CT: computed tomography, IIM: idiopathic inflammatory myositis, ILD: interstitial lung disease, NSIP: non-specific interstitial pneumonia, OP: organizing pneumonia, other: other and undifferentiated, UIP: usual interstitial pneumonia.

**Figure S2d** Study level data on pSS-ILD CT patterns

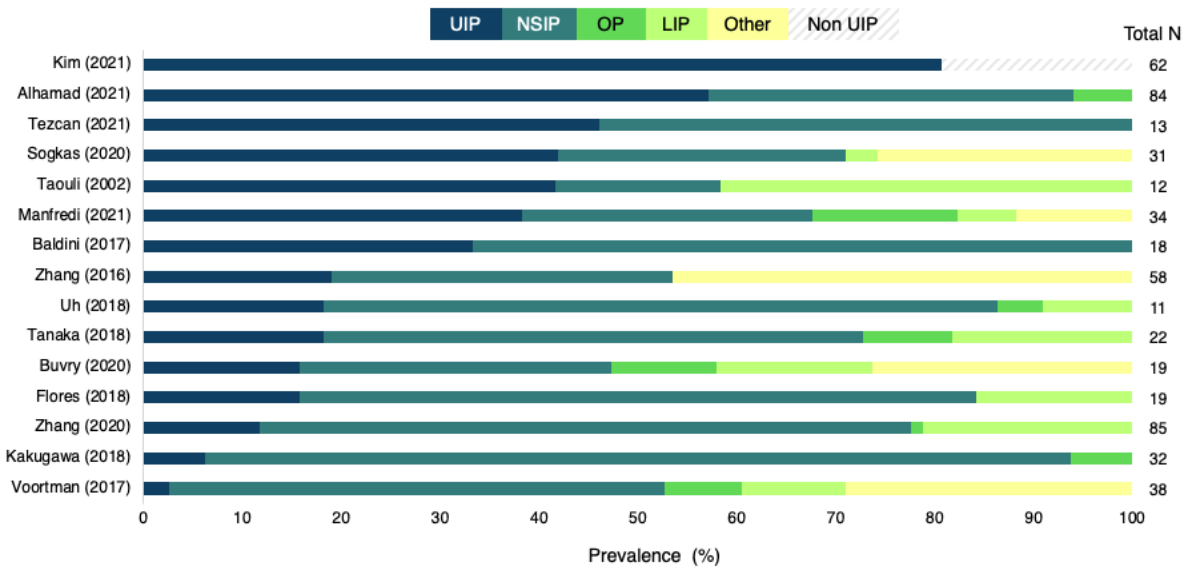

Abbreviations: CT: computed tomography, ILD: interstitial lung disease, LIP: lymphocytic interstitial pneumonia, NSIP: non-specific interstitial pneumonia, OP: organizing pneumonia, other: other and undifferentiated, pSS: primary Sjögren syndrome, UIP: usual interstitial pneumonia.

**Figure S2e** Study level data on MCTD-ILD CT patterns

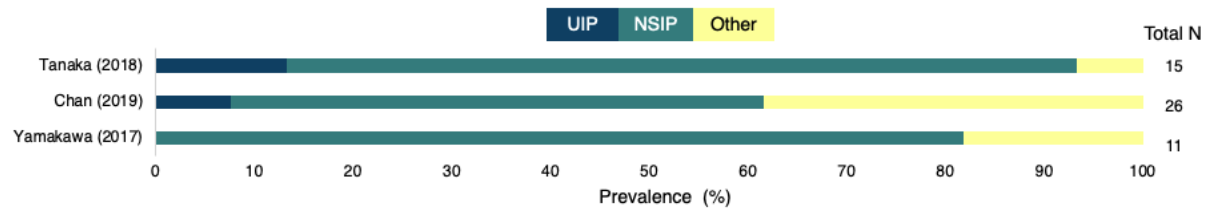

Abbreviations: CT: computed tomography, ILD: interstitial lung disease, MCTD: mixed connective tissue disease, NSIP: non-specific interstitial pneumonia, other: other and undifferentiated, UIP: usual interstitial pneumonia.

**Figure S2f** Study level data on SLE-ILD CT patterns

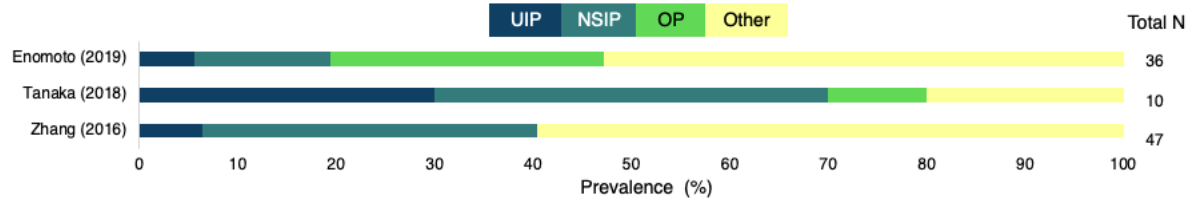

Abbreviations: CT: computed tomography, ILD: interstitial lung disease, NSIP: non-specific interstitial pneumonia, OP: organizing pneumonia, other: other and undifferentiated, SLE: systemic lupus erythematosus, UIP: usual interstitial pneumonia.

**Figure S2f** Study level data on UCTD-ILD CT patterns

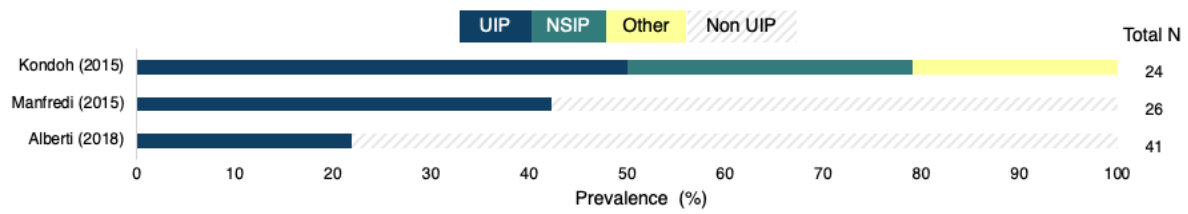

Abbreviations: CT: computed tomography, ILD: interstitial lung disease, NSIP: non-specific interstitial pneumonia, other: other and undifferentiated, UCTD: undifferentiated connective tissue disease, UIP: usual interstitial pneumonia.

## SUPPLEMENTAL TABLES

**Table S1a** Embase search strategy

|    |                                                                                                                                                                                                                        |
|----|------------------------------------------------------------------------------------------------------------------------------------------------------------------------------------------------------------------------|
| 1  | Exp rheumatoid arthritis/                                                                                                                                                                                              |
| 2  | Rheumatoid.mp.                                                                                                                                                                                                         |
| 3  | Exp scleroderma/                                                                                                                                                                                                       |
| 4  | Scleroderma.mp.                                                                                                                                                                                                        |
| 5  | "systemic sclero*".mp.                                                                                                                                                                                                 |
| 6  | Exp Sjogren syndrome/                                                                                                                                                                                                  |
| 7  | Sj#gren*.mp.                                                                                                                                                                                                           |
| 8  | Myositis/                                                                                                                                                                                                              |
| 9  | Antisynthetase syndrome/                                                                                                                                                                                               |
| 10 | Dermatomyositis/                                                                                                                                                                                                       |
| 11 | Polymyositis/                                                                                                                                                                                                          |
| 12 | Dermatomyositis.mp.                                                                                                                                                                                                    |
| 13 | Polymyositis.mp.                                                                                                                                                                                                       |
| 14 | "antisynthetase syndrome".mp.                                                                                                                                                                                          |
| 15 | "inflammatory myositis".mp.                                                                                                                                                                                            |
| 16 | Connective tissue disease/                                                                                                                                                                                             |
| 17 | "connective tissue dis*".mp.                                                                                                                                                                                           |
| 18 | "collagen vascular dis*".mp.                                                                                                                                                                                           |
| 19 | Exp mixed connective tissue disease/                                                                                                                                                                                   |
| 20 | "mixed ctd".mp.                                                                                                                                                                                                        |
| 21 | "undifferentiated ctd".mp.                                                                                                                                                                                             |
| 22 | Exp systemic lupus erythematosus/                                                                                                                                                                                      |
| 23 | Lupus.mp.                                                                                                                                                                                                              |
| 24 | or/1-23                                                                                                                                                                                                                |
| 25 | Exp interstitial lung disease/                                                                                                                                                                                         |
| 26 | Exp lung fibrosis/                                                                                                                                                                                                     |
| 27 | (interstitial\$ adj3 (lung\$ or pulmonary\$ or pneumon\$)).mp.                                                                                                                                                         |
| 28 | ((pulmonary\$ or lung\$) adj3 (fibros\$ or fibrot\$)).mp.                                                                                                                                                              |
| 29 | ILD.mp.                                                                                                                                                                                                                |
| 30 | UIP.mp.                                                                                                                                                                                                                |
| 31 | NSIP.mp.                                                                                                                                                                                                               |
| 32 | PPFE.mp.                                                                                                                                                                                                               |
| 33 | "pleuroparenchymal fibroelastosis".mp.                                                                                                                                                                                 |
| 34 | Bronchiolitis.mp.                                                                                                                                                                                                      |
| 35 | Alveolitis.mp.                                                                                                                                                                                                         |
| 36 | "organi#ing pneumon*".mp.                                                                                                                                                                                              |
| 37 | or/25-36                                                                                                                                                                                                               |
| 38 | Computer assisted tomography/ or computed tomographic angiography/ or high resolution computer tomography/ or multidetector computed tomography/ or spiral computer assisted tomography/ or x-ray computed tomography/ |
| 39 | Hrct.mp.                                                                                                                                                                                                               |
| 40 | "computed tomography".mp.                                                                                                                                                                                              |
| 41 | "ct-scan".mp.                                                                                                                                                                                                          |
| 42 | Prevalence/                                                                                                                                                                                                            |
| 43 | Prevalence.mp.                                                                                                                                                                                                         |
| 44 | Risk factor/                                                                                                                                                                                                           |
| 45 | "risk factor*".mp.                                                                                                                                                                                                     |
| 46 | Biomarker*.mp                                                                                                                                                                                                          |
| 47 | or/38-46                                                                                                                                                                                                               |
| 48 | 24 and 37 and 47                                                                                                                                                                                                       |
| 49 | Limit 48 to yr="2000 – Current"                                                                                                                                                                                        |

**Table S1b** Medline search strategy



|    |                                                                                                     |
|----|-----------------------------------------------------------------------------------------------------|
| 1  | exp Arthritis, Rheumatoid/                                                                          |
| 2  | rheumatoid.mp.                                                                                      |
| 3  | exp Scleroderma, Systemic/ or exp Scleroderma, Localized/                                           |
| 4  | scleroderma.mp.                                                                                     |
| 5  | "systemic sclero*".mp.                                                                              |
| 6  | exp Sjogren's Syndrome/                                                                             |
| 7  | sj#gren*.mp.                                                                                        |
| 8  | exp Dermatomyositis/                                                                                |
| 9  | dermatomyositis.mp.                                                                                 |
| 10 | exp Polymyositis/                                                                                   |
| 11 | polymyositis.mp.                                                                                    |
| 12 | "antisyntetase syndrome".mp.                                                                        |
| 13 | "inflammatory myositis".mp.                                                                         |
| 14 | Connective Tissue Diseases/                                                                         |
| 15 | "connective tissue dis*".mp.                                                                        |
| 16 | "collagen vascular dis*".mp.                                                                        |
| 17 | exp Mixed Connective Tissue Disease/                                                                |
| 18 | "mixed ctd".mp.                                                                                     |
| 19 | exp Undifferentiated Connective Tissue Diseases/                                                    |
| 20 | "undifferentiated ctd".mp.                                                                          |
| 21 | exp Lupus Erythematosus, Systemic/                                                                  |
| 22 | lupus.mp.                                                                                           |
| 23 | or/1-22                                                                                             |
| 24 | exp Lung Diseases, Interstitial/                                                                    |
| 25 | exp Pulmonary Fibrosis/                                                                             |
| 26 | (interstitial\$ adj3 (lung\$ or pulmonary\$ or pneumon\$)).mp.                                      |
| 27 | ((pulmonary\$ or lung\$) adj3 (fibros\$ or fibrot\$)).mp.                                           |
| 28 | ild.mp.                                                                                             |
| 29 | Uip.mp.                                                                                             |
| 30 | Nsip.mp.                                                                                            |
| 31 | Ppfe.mp.                                                                                            |
| 32 | "pleuroparenchymal fibroelastosis".mp.                                                              |
| 33 | bronchiolitis.mp.                                                                                   |
| 34 | alveolitis.mp.                                                                                      |
| 35 | "organi\$ing pneumon*".mp.                                                                          |
| 36 | or/24-35                                                                                            |
| 37 | tomography, x-ray computed/ or computed tomography angiography/ or exp tomography, spiral computed/ |
| 38 | HRCT.mp.                                                                                            |
| 39 | "computed tomography".mp.                                                                           |
| 40 | "CT-scan".mp.                                                                                       |
| 41 | Prevalence/                                                                                         |
| 42 | Prevalence.mp.                                                                                      |
| 43 | protective factors/ or risk factors/                                                                |
| 44 | "risk factor*".mp.                                                                                  |
| 45 | biomarker*.mp.                                                                                      |
| 46 | or/37-45                                                                                            |
| 47 | 23 and 36 and 46                                                                                    |
| 48 | limit 47 to yr="2020 -Current"                                                                      |

**Table S2** Number of studies and total sample size addressing each objective. Data are reported as number of studies (included conference abstracts), N = total number of patients.

| Connective Tissue Disease                  | Prevalence            | Risk Factors for ILD  | ILD Pattern          | Risk Factors for ILD Pattern |
|--------------------------------------------|-----------------------|-----------------------|----------------------|------------------------------|
| Rheumatoid Arthritis                       | 23 (6)<br>N = 18,884  | 41 (10)<br>N = 11,806 | 54 (13)<br>N = 4,897 | 8 (1)<br>N = 1,543           |
| Systemic Sclerosis                         | 69 (13)<br>N = 31,096 | 33 (3)<br>N = 24,281  | 22 (4)<br>N = 1,263  |                              |
| Idiopathic Inflammatory Myositis           | 27 (1)<br>N = 3,781   | 22 (2)<br>N = 3,349   | 23 (2)<br>N = 1,305  | 1 (0)<br>N = 48              |
| Primary Sjögren Syndrome                   | 11 (4)<br>N = 3,899   | 8 (3)<br>N = 3,716    | 16 (5)<br>N = 722    | 1 (0)<br>N = 170             |
| Mixed Connective Tissue Disease            | 4 (1)<br>N = 599      | 3 (2)<br>N = 537      | 3 (0)<br>N = 52      |                              |
| Systemic Lupus Erythematosus               | 5 (2)<br>N = 6,749    | 1 (1)<br>N = 289      | 3 (0)<br>N = 93      |                              |
| Undifferentiated Connective Tissue Disease |                       |                       | 3 (1)<br>N = 91      | 1 (0)<br>N = 66              |

Abbreviations:  
CT: computed tomography, ILD: interstitial lung disease

**Table S3a** Characteristics of studies addressing prevalence of RA-ILD, distribution of CT patterns of RA-ILD, and risk factors for development of RA-ILD.

| Study Characteristic           | Prevalence Studies  | Risk Factor ILD Studies | CT Pattern Studies  | Risk Factor CT Pattern Studies |
|--------------------------------|---------------------|-------------------------|---------------------|--------------------------------|
| Total Studies                  | 23                  | 41                      | 54                  | 8                              |
| Conference Abstracts           | 6                   | 10                      | 13                  | 1                              |
| Total N                        | 18,884              | 11,806                  | -                   | 1,543                          |
| N ILD                          | 1,055               | 3,548                   | 4,897               | 1,206                          |
| <b>Demographics</b>            |                     |                         |                     |                                |
| Age (years, mean)              | 54.3 (N = 2,845)    | 57.1 (N = 3,309)        | 61.3 (N = 1,667)    | 61.7 (N = 610)                 |
| Disease Duration (years, mean) | 7.3 (N = 2,372)     | 7.7 (N = 2,530)         | 9.6 (N = 455)       | 10.2 (N = 88)                  |
| Sex (male)                     | 841/4,153 (20.3%)   | 1,788/6,901 (25.9%)     | 1,577/3,960 (39.8%) | 353/848 (41.6%)                |
| Smoking History (ever)         | 677/3,097 (21.9%)   | 1,935/6,012 (32.2%)     | 1,695/3,604 (47.0%) | 115/269 (42.6%)                |
| <b>Serology</b>                |                     |                         |                     |                                |
| RF                             | 1,742/2,608 (66.8%) | 2,992/4,146 (72.2%)     | 2,786/3,294 (84.6%) | -                              |
| Anti-CCP                       | 1,608/2,158 (74.5%) | 2,579/3,570 (72.2%)     | 2,427/2,862 (84.8%) | -                              |
| <b>Lung Function</b>           |                     |                         |                     |                                |
| FVC (mean % predicted)         | -                   | -                       | 80.1 (N = 2,359)    | -                              |
| TLC (mean % predicted)         | -                   | -                       | 76.9 (N = 783)      | -                              |
| DLCO (mean % predicted)        | -                   | -                       | 60.2 (N = 2,117)    | -                              |

Abbreviations: ANA: antinuclear antibody, anti-CCP: anti-cyclic citrullinated peptide, CT: computed tomography, DLCO: diffusion capacity for carbon monoxide, FVC: forced vital capacity, ILD: interstitial lung disease, RA: rheumatoid arthritis, RF: rheumatoid factor, TLC: total lung capacity.

**Table S3b** Characteristics of studies addressing prevalence of SSc-ILD, distribution of CT patterns of SSc-ILD, and risk factors for development of SSc-ILD. No studies address risk factors for specific CT patterns.

| Study Characteristic           | Prevalence Studies    | Risk Factor ILD Studies | CT Pattern Studies |
|--------------------------------|-----------------------|-------------------------|--------------------|
| Total Studies                  | 69                    | 33                      | 22                 |
| Conference Abstracts           | 13                    | 3                       | 4                  |
| Total N                        | 31,096                | 24,281                  | -                  |
| Total N ILD                    | 11,330                | 7,499                   | 1,263              |
| <b>Demographics</b>            |                       |                         |                    |
| Age (years, mean)              | 55.4 (N = 26,273)     | 55.3 (N = 22,625)       | 56.0 (N = 659)     |
| Disease Duration (years, mean) | 9.1 (N = 23,874)      | 8.8 (N = 21,314)        | -                  |
| Sex (male)                     | 4,747/31,250 (15.2%)  | 3,519/24,041 (14.6%)    | 127/837 (15.2%)    |
| Smoking History (ever)         | 950/2,705 (35.1%)     | 482/1,549 (31.1%)       | 178/570 (31.2%)    |
| CTD Subtype                    |                       |                         |                    |
| Limited SSc                    | 17,541/30,139 (58.2%) | 13,034/23,298 (55.9%)   | 194/378 (51.3%)    |
| Diffuse SSc                    | 9,503/30,734 (30.9%)  | 7,340/23,696 (31.0%)    | 183/378 (48.4%)    |
| <b>Serology</b>                |                       |                         |                    |
| ANA                            | 21,837/22,892 (95.4%) | 20,536/21,498 (95.5%)   | 319/345 (92.0%)    |
| Anti-Scl70                     | 8,280/28,103 (29.5%)  | 7,007/22,876 (30.6%)    | 260/486 (53.5%)    |
| Anti-Centromere                | 10,562/28,237 (37.4%) | 8,713/23,207 (37.5%)    | 69/476 (14.4%)     |
| Anti-RNP                       | 1668/21,598 (7.7%)    | 1,536/20,839 (7.4%)     | -                  |
| <b>Lung Function</b>           |                       |                         |                    |
| FVC                            | 90.2 (N = 1,720)      | 93.3 (N = 1,257)        | 80.8 (N = 595)     |
| DLCO (mean % predicted)        | 66.0 (N = 1,598)      | 63.7 (N = 1,257)        | 57.2 (N = 595)     |

Abbreviations: ANA: antinuclear antibody, CT: computed tomography, CTD: connective tissue disease, DLCO: diffusion capacity for carbon monoxide, FVC: forced vital capacity, ILD: interstitial lung disease, SSc: systemic sclerosis.

**Table S3c** Characteristics of studies addressing prevalence of IIM-ILD, distribution of CT patterns of IIM-ILD, and risk factors for development of IIM-ILD.

| Study Characteristic    | Prevalence Studies  | Risk Factor ILD Studies | CT Pattern Studies | Risk Factor CT Pattern Studies |
|-------------------------|---------------------|-------------------------|--------------------|--------------------------------|
| Total Studies           | 27                  | 22                      | 23                 | 1                              |
| Conference Abstracts    | 1                   | 2                       | 2                  | 0                              |
| Total N                 | 3,781               | 3,349                   | -                  | -                              |
| Total N ILD             | 1,335               | 948                     | 1,305              | 48                             |
| <b>Demographics</b>     |                     |                         |                    |                                |
| Age (years, mean)       | 49.5 (N = 722)      | 49.4 (N = 682)          | 52.1 (N = 602)     | -                              |
| Sex (male)              | 912/2,980 (30.6%)   | 933/3,011 (31.0%)       | 366/1,110 (33.0%)  | 17/48 (35.4%)                  |
| Smoking History (ever)  | -                   | -                       | 137/392 (34.9%)    | 19/48 (39.6%)                  |
| CTD Subtype             |                     |                         |                    |                                |
| Dermatomyositis         | 1,997/3,447 (57.9%) | 1,674/3,075 (54.4%)     | 414/866 (47.8%)    | 18/48 (37.5%)                  |
| Polymyositis            | 1,206/2,729 (44.2%) | 871/1,892 (46.0%)       | 323/831 (38.9%)    | 6/48 (12.5%)                   |
| <b>Serology</b>         |                     |                         |                    |                                |
| ANA                     | 280/589 (47.5%)     | -                       | 2                  | -                              |
| Anti-Jo-1               | 105/841 (12.5%)     | 63/599 (10.4%)          | 2                  | 6/48 (12.5%)                   |
| <b>Lung Function</b>    |                     |                         |                    |                                |
| FVC                     | -                   | -                       | 72.2 (N = 586)     | -                              |
| DLCO (mean % predicted) | -                   | -                       | 60.4 (N = 522)     | -                              |

Abbreviations: ANA: antinuclear antibody, CT: computed tomography, CTD: connective tissue disease, DLCO: diffusion capacity for carbon monoxide, FVC: forced vital capacity, IIM: idiopathic inflammatory myositis, ILD: interstitial lung disease.

**Table S3d** Characteristics of studies addressing prevalence of pSS-ILD, distribution of CT patterns of pSS-ILD, and risk factors for development of pSS-ILD.

| Study Characteristic           | Prevalence Studies  | Risk Factor ILD Studies | CT Pattern Studies | Risk Factor CT Pattern Studies |
|--------------------------------|---------------------|-------------------------|--------------------|--------------------------------|
| Total Studies                  | 11                  | 8                       | 16                 | 1                              |
| Conference Abstracts           | 4                   | 3                       | 5                  | 0                              |
| Total N                        | 3,899               | 3,715                   | -                  | 170                            |
| Total N ILD                    | 562                 | 641                     | 722                | 85                             |
| <b>Demographics</b>            |                     |                         |                    |                                |
| Age (years, mean)              | 50.4 (N = 1,460)    | -                       | 58.8 (N = 457)     | -                              |
| Disease Duration (years, mean) | 8.7 (N = 482)       | -                       | -                  | -                              |
| Sex (male)                     | 202/3,555 (5.7%)    | 201/3,447 (5.8%)        | 90/522 (17.2%)     | 16/170 (9.4%)                  |
| Smoking History (ever)         | -                   | -                       | 59/309 (19.1%)     | -                              |
| <b>Serology</b>                |                     |                         |                    |                                |
| ANA                            | 1,080/1,677 (64.4%) | 1,473/1,683 (87.5%)     | 378/475 (79.5%)    | 163/170 (95.9%)                |
| Anti-SSA/Ro                    | 1,004/1,821 (55.1%) | 1,507/1,851 (81.4%)     | 317/478 (66.3%)    | 141/170 (82.9%)                |
| Anti-SSB/La                    | 510/1,821 (28.2%)   | 791/1,832 (43.2%)       | 144/475 (30.4%)    | 78/170 (45.9%)                 |
| <b>Lung Function</b>           |                     |                         |                    |                                |
| FVC (mean % predicted)         | -                   | -                       | 66.53 (N = 350)    | -                              |
| DLCO (mean % predicted)        | -                   | -                       | 58.6 (N = 350)     | -                              |

Abbreviations: ANA: antinuclear antibody, CT: computed tomography, CTD: connective tissue disease, DLCO: diffusion capacity for carbon monoxide, FVC: forced vital capacity, ILD: interstitial lung disease, pSS: primary Sjögren syndrome.

**Table S3e** Characteristics of studies addressing prevalence of SLE-ILD, distribution of CT patterns of SLE-ILD, and risk factors for development of SLE-ILD. No studies addressed CT pattern risk factors.

| Study Characteristic           | Prevalence Studies  | Risk Factor ILD Studies | CT Pattern Studies |
|--------------------------------|---------------------|-------------------------|--------------------|
| Total Studies                  | 5                   | 1                       | 3                  |
| <i>Conference Abstracts</i>    | 2                   | 1                       | 0                  |
| Total N                        | 6,749               | 289                     | -                  |
| Total N ILD                    | 498                 | 23                      | 93                 |
| <b>Demographics</b>            |                     |                         |                    |
| Age (years, mean)              | 46.4 (N = 3,685)    | -                       | 55.4 (N = 10)      |
| Disease Duration (years, mean) | 9.1 (N = 3,685)     | -                       | -                  |
| Sex (male)                     | 360/3,974 (9.1%)    | 42/289 (14.5%)          | 15/65 (23.1%)      |
| Smoking History (ever)         | 1,351/3,215 (42.0%) | -                       | 16/55 (29.1%)      |
| <b>Serology</b>                |                     |                         |                    |
| ANA                            | -                   | -                       | -                  |
| <b>Lung Function</b>           |                     |                         |                    |
| FVC (median % predicted)       | -                   | -                       | 81.8 (N = 55)      |
| DLCO (median % predicted)      | -                   | -                       | 57.4 (N = 55)      |

Abbreviations: ANA: antinuclear antibody, CT: computed tomography, CTD: connective tissue disease, DLCO: diffusion capacity for carbon monoxide, FVC: forced vital capacity, ILD: interstitial lung disease, SLE: systemic lupus erythematosus.

**Table S3f** Characteristics of studies addressing prevalence of MCTD-ILD, distribution of CT patterns of MCTD-ILD, and risk factors for development of MCTD-ILD. No studies addressed risk factors for specific CT patterns.

| Study Characteristic           | Prevalence Studies | Risk Factor ILD Studies | CT Pattern Studies |
|--------------------------------|--------------------|-------------------------|--------------------|
| Total Studies                  | 4                  | 3                       | 3                  |
| <i>Conference Abstracts</i>    | 1                  | 2                       | 0                  |
| Total N                        | 599                | 537                     | -                  |
| Total N ILD                    | 327                | 292                     | 52                 |
| <b>Demographics</b>            |                    |                         |                    |
| Age (years, mean)              | 47.5 (N = 194)     | 49.1 (N = 144)          | 49.8 (N = 52)      |
| Disease Duration (years, mean) | 12.0 (N = 194)     | 13.4 (N = 144)          | -                  |
| Sex (male)                     | 15/234 (6.4%)      | 11/144 (7.6%)           | 6/52 (11.5%)       |
| Smoking History (ever)         | 8/50 (16.0%)       | -                       | 13/ 37 (35.1%)     |
| <b>Serology</b>                |                    |                         |                    |
| RF                             | 43/144 (30.0%)     | 43/144 (30.0%)          | -                  |
| Anti-CCP                       | -                  | -                       | -                  |
| ANA                            | 144/144 (100.5%)   | 144/144 (100.0%)        | -                  |
| <b>Lung Function</b>           |                    |                         |                    |
| FVC (mean % predicted)         | 82.0 (N = 50)      | -                       | 77.6 (N = 37)      |
| TLC (mean % predicted)         | 87.0 (N = 50)      | -                       | -                  |
| DLCO (mean % predicted)        | 87.0 (N = 50)      | -                       | 58.3 (N = 37)      |

Abbreviations: ANA: antinuclear antibody, anti-CCP: anti-cyclic citrullinated peptide, CT: computed tomography, DLCO: diffusion capacity for carbon monoxide, FVC: forced vital capacity, ILD: interstitial lung disease, MCTD: mixed connective tissue disease, RF: rheumatoid factor, TLC: total lung capacity.



**Table S3g** Characteristics of studies addressing prevalence of UCTD-ILD, distribution of CT patterns of UCTD-ILD, and risk factors for development of UCTD-ILD. No studies addressed prevalence of ILD or risk factors for ILD in UCTD.

| Study Characteristic        | CT Pattern Studies | Risk Factor CT Pattern Studies |
|-----------------------------|--------------------|--------------------------------|
| Total Studies               | 3                  | 1                              |
| <i>Conference Abstracts</i> | 1                  | 0                              |
| Total N                     | -                  | 66                             |
| Total N ILD                 | 91                 | 41                             |
| <b>Demographics</b>         |                    |                                |
| Age (years, mean)           | 62.4 (N = 24)      | 57.7 (N = 66)                  |
| Sex (male)                  | 21/50 (42.0%)      | 21/66 (31.8%)                  |
| Smoking History (ever)      | 13/24 (54.2%)      | 29/66 (44.0%)                  |
| <b>Serology</b>             |                    |                                |
| RF                          | 8/50 (15.2%)       | 29/62 (46.8%)                  |
| ANA                         | 34/50 (67.3%)      | 57/65 (87.7%)                  |
| <b>Lung Function</b>        |                    |                                |
| FVC (mean % predicted)      | 79.0 (N = 24)      | -                              |
| DLCO (mean % predicted)     | 59.7 (N = 24)      | -                              |

Abbreviations: ANA: antinuclear antibody, CT: computed tomography, DLCO: diffusion capacity for carbon monoxide, FVC: forced vital capacity, ILD: interstitial lung disease, RF: rheumatoid factor, UCTD: undifferentiated connective tissue disease.

**Table S4** List of references, study characteristics, and quality of evidence.

| Reference                                                                                                                                                                                                                                                                                                                                                                                                                                                        | Year | Country           | Connective Tissue Disease                                                                                                                                                                                                                               | Total N | ILD N | Newcastle Ottawa Scale                  |
|------------------------------------------------------------------------------------------------------------------------------------------------------------------------------------------------------------------------------------------------------------------------------------------------------------------------------------------------------------------------------------------------------------------------------------------------------------------|------|-------------------|---------------------------------------------------------------------------------------------------------------------------------------------------------------------------------------------------------------------------------------------------------|---------|-------|-----------------------------------------|
|                                                                                                                                                                                                                                                                                                                                                                                                                                                                  |      |                   | 1 = Rheumatoid arthritis<br>2 = Systemic sclerosis<br>3 = Idiopathic inflammatory myositis<br>4 = Primary Sjögren syndrome<br>5 = Mixed connective tissue disease<br>6 = Systemic lupus erythematosus<br>7 = Undifferentiated connective tissue disease |         |       | 0-3 = Low<br>4-6 = Medium<br>7-9 = High |
| Aguilera Cros C, Ruiz Roman A, Lisbona Munoz M, Luque Leon M, Leon Rubio P, Sanchez Serrano JP, Povedano Gomez J, Rodriguez Portal JA. Prevalence and significance of rheumatoid factor and anti-CCP in patients with interstitial lung disease and rheumatoid arthritis. In; 2016 2016: Annual European Congress of Rheumatology of the European League Against Rheumatism, EULAR 2016. United Kingdom. 75 (Supplement 2) (pp 956); BMJ Publishing Group; 2016. | 2016 | Spain             | 1                                                                                                                                                                                                                                                       | 45      | 45    | 7                                       |
| Alamoudi OSB, Attar SM. Pleuropulmonary manifestation in patients with rheumatoid arthritis in Saudi Arabia. <i>Annals of Thoracic Medicine</i> 2017; 12(4): 266-271.                                                                                                                                                                                                                                                                                            | 2017 | Saudi Arabia      | 1                                                                                                                                                                                                                                                       | 419     | 30    | 8                                       |
| Alberti ML, Paulin F, Toledo HM, Fernandez ME, Caro FM, Rojas-Serrano J, Mejia ME. Undifferentiated connective tissue disease and interstitial lung disease: Trying to define patterns. <i>Reumatologia Clinica</i> 2018; 14(2): 75-80.                                                                                                                                                                                                                          | 2018 | Mexico, Argentina | 7                                                                                                                                                                                                                                                       | 66      | 41    | 7                                       |
| Alemao E, Doyle T, Sparks J, Rao A, Saini Y, Iannaccone C, Weinblatt ME, Shadick N. Evaluation of rheumatoid arthritis treatments and joint outcomes in rheumatoid arthritis-associated interstitial lung disease. In; 2019 2019: Annual European Congress of Rheumatology, EULAR 2019. Spain. 78 (Supplement 2) (pp 1099-1100); BMJ Publishing Group; 2019.                                                                                                     | 2019 | USA               | 1                                                                                                                                                                                                                                                       | 75      | 46    | 8                                       |

|                                                                                                                                                                                                                                                                                                                                                                                                                                         |      |              |      |      |     |   |
|-----------------------------------------------------------------------------------------------------------------------------------------------------------------------------------------------------------------------------------------------------------------------------------------------------------------------------------------------------------------------------------------------------------------------------------------|------|--------------|------|------|-----|---|
| Alhamad E, Cal J, Alrajhi N, Paramasivam M, Alharbi W, Alessa M, Omair M, Alrikabi A, Alboukai A. Clinical characteristics and outcomes in patients with primary Sjogren's syndrome-associated interstitial lung disease. <i>Annals of Thoracic Medicine</i> 2021; 16(2): 156-164.                                                                                                                                                      | 2021 | Saudi Arabia | 4    | 84   | 84  | 7 |
| AlSheikh H, Ahmad Z, Johnson SR. Ethnic variations in systemic sclerosis disease manifestations, internal organ involvement, and mortality. <i>JRheumatol</i> 2019; 46(9): 1103-1108.                                                                                                                                                                                                                                                   | 2019 | Canada       | 2    | 1005 | 349 | 8 |
| Amoura Z, Duhaut P, Huong DLT, Wechsler B, Costedoat-Chalumeau N, Frances C, Cacoub P, Papo T, Cormont S, Toutou Y, Grenier P, Valeyre D, Piette J-C. Tumor antigen markers for the detection of solid cancers in inflammatory myopathies. <i>Cancer EpidemiolBiomarkers Prev</i> 2005; 14(5): 1279-1282.                                                                                                                               | 2005 | France       | 3    | 102  | 26  | 8 |
| Ananyeva I, Teplova LV, Lesnyak VN, Starovojtova MN, Desinova OV, Nevskaya TA. Relationship between computed tomography and lung function parameters in patients with different duration of systemic sclerosis. In; 2010 2010: (var.pagings). 28 (2 SUPPL. 58) (pp S151); <i>Clinical and Experimental Rheumatology S.A.S.</i> ; 2010.                                                                                                  | 2010 | Russia       | 2    | 138  | 113 | 8 |
| Atienza-Mateo B, Remuzgo-Martinez S, Cuesta VMM, Iturbe-Fernandez D, Fernandez-Rozas S, Prieto-Pena D, Calderon-Goercke M, Corrales A, Rodriguez GB, Gomez-Roman JJ, Gonzalez-Gay MA, Cifrian JM. The spectrum of interstitial lung disease associated with autoimmune diseases: Data of a 3.6-year prospective study from a referral center of interstitial lung disease and lung transplantation. <i>J Clin Med</i> 2020; 9(6): 1606. | 2020 | Spain        | 1, 2 | 89   | 89  | 7 |

|                                                                                                                                                                                                                                                                                                                                                                         |      |               |   |      |     |   |
|-------------------------------------------------------------------------------------------------------------------------------------------------------------------------------------------------------------------------------------------------------------------------------------------------------------------------------------------------------------------------|------|---------------|---|------|-----|---|
| Atukorala I, Solangaarachchi C, Weeratunga PN, Wijayarathne LS, Weerasekera L. Rheumatoid lung disease and tuberculosis in a cohort of Sri Lankan patients with Rheumatoid Arthritis. In; 2012 2012: (var.pagings). 15 (SUPPL. 1) (pp 51); Blackwell Publishing; 2012.                                                                                                  | 2012 | Sri Lanka     | 1 | 231  | 12  | 6 |
| Aubart F, Crestani B, NicaiseRoland P, Tubach F, Bollet C, Dawidowicz K, Quintin E, Hayem G, Palazzo E, Meyer O, CholletMartin S, Dieude P. High levels of anti-cyclic citrullinated peptide autoantibodies are associated with co-occurrence of pulmonary diseases with rheumatoid arthritis. <i>JRheumatol</i> 2011; 38(6): 979-982.                                  | 2011 | France        | 1 | 252  | 23  | 6 |
| Avouac J, Airo P, Dieude P, Caramaschi P, Tiev K, Diot E, Sibilia J, Cappelli S, Granel B, Vacca A, Wipff J, Meyer O, Kahan A, MatucciCerinic M, Allanore Y. Associated autoimmune diseases in systemic sclerosis define a subset of patients with milder disease: Results from 2 large cohorts of European Caucasian patients. <i>JRheumatol</i> 2010; 37(3): 608-614. | 2010 | France, Italy | 2 | 1132 | 395 | 8 |
| Avouac J, Cauvet A, Steelandt A, Shirai Y, Elhai M, Kuwana M, Distler O, Allanore Y. Improving risk-stratification of rheumatoid arthritis patients for interstitial lung disease. <i>PLoS one</i> 2020; 15(5): e0232978.                                                                                                                                               | 2020 | Germany       | 1 | 40   | 40  | 9 |
| Azuma K, Yamada H, Ohkubo M, Yamasaki Y, Yamasaki M, Mizushima M, Ozaki S. Incidence and predictive factors for malignancies in 136 Japanese patients with dermatomyositis, polymyositis and clinically amyopathic dermatomyositis. <i>Modern Rheumatology</i> 2011; 21(2): 178-183.                                                                                    | 2011 | Japan         | 3 | 136  | 73  | 8 |

|                                                                                                                                                                                                                                                                                                                                                                                                                                                                        |      |           |   |     |    |   |
|------------------------------------------------------------------------------------------------------------------------------------------------------------------------------------------------------------------------------------------------------------------------------------------------------------------------------------------------------------------------------------------------------------------------------------------------------------------------|------|-----------|---|-----|----|---|
| Bagnato G, Pigatto E, Bitto A, Pizzino C, Irrera N, Abignano G, Hutchinson M, Squadrito F, Buch MH, Gangemi S, Roberts WN, Saitta A, Cozzi F, Del Galdo F. Predictive value of a combined index for weight loss in systemic sclerosis. In; 2017 2017: American College of Rheumatology/Association of Rheumatology Health Professionals Annual Scientific Meeting, ACR/ARHP 2017. United States. 69 (Supplement 10) (no pagination); John Wiley and Sons Inc.; 2017.   | 2017 | UK, Italy | 2 | 180 | 64 | 6 |
| Baillieu NA, Tabaj G, Villagomez R, Di Boscio V, Quadrelli SA. Computed tomography characteristics and five-year survival in patients with systemic sclerosis. In; 2010 2010: (var.pagings). 138 (4) (no pagination); American College of Chest Physicians; 2010.                                                                                                                                                                                                      | 2010 | Argentina | 2 | 70  | 40 | 7 |
| Balanescu P, Balanescu E, Baicus C, Balanescu A. S100A6, Calumenin and Cytohesin 2 as Biomarkers for Cutaneous Involvement in Systemic Sclerosis Patients: A Case Control Study. <i>J pers med</i> 2021: 11(5).                                                                                                                                                                                                                                                        | 2021 | Romania   | 2 | 53  | 28 | 7 |
| Balcazar R, Brigante A, Maldonado F, Yucra D, Hamaui A, Dubinsky D. Capillaroscopic findings in patients with systemic sclerosis with and without lung involvement. In; 2019 2019: 21st Pan American Rheumatology Congress, PANLAR 2019. Ecuador. 25 (3 Supplement) (pp S91); Lippincott Williams and Wilkins; 2019.                                                                                                                                                   | 2019 | Argentina | 2 | 58  | 22 | 7 |
| Baldini C, Puxeddu I, Orlandi M, Ferro F, Elefante E, Luciano N, MatucciCerinic M, Migliorini P, Mosca M. Interstitial lung disease in primary sjogren's syndrome : Clinical presentation, serological biomarkers and long term outcome. In; 2017 2017: American College of Rheumatology/Association of Rheumatology Health Professionals Annual Scientific Meeting, ACR/ARHP 2017. United States. 69 (Supplement 10) (no pagination); John Wiley and Sons Inc.; 2017. | 2017 | Italy     | 4 | 285 | 18 | 7 |

|                                                                                                                                                                                                                                                                                                                                                                                                                                                                                                                                                        |      |             |   |     |     |   |
|--------------------------------------------------------------------------------------------------------------------------------------------------------------------------------------------------------------------------------------------------------------------------------------------------------------------------------------------------------------------------------------------------------------------------------------------------------------------------------------------------------------------------------------------------------|------|-------------|---|-----|-----|---|
| <p>Ballerie A, Cavalin C, Lederlin M, Nicolas A, Garlantezec R, Jouneau S, Lecureur V, Cazalets C, Belhomme N, Paris C, Rosental P-A, Jego P, Lescoat A. Association of silica exposure with chest HRCT and clinical characteristics in systemic sclerosis. <i>Semin Arthritis Rheum</i> 2020; 50(5): 949-956.</p>                                                                                                                                                                                                                                     | 2020 | France      | 2 | 97  | 31  | 8 |
| <p>Benyamine A, Heim X, Resseguier N, Bertin D, Gomez C, Ebbo M, Harle J-R, Kaplanski G, Rossi P, Bardin N, Granel B. Elevated serum Krebs von den Lungen-6 in systemic sclerosis: a marker of lung fibrosis and severity of the disease. <i>RheumatolInt</i> 2018; 38(5): 813-819.</p>                                                                                                                                                                                                                                                                | 2018 | Germany     | 2 | 75  | 25  | 5 |
| <p>Best M, Jachiet M, Molinari N, Manna F, Girard C, Pallure V, Cosnes A, Lipsker D, Hubiche T, Schmutz JL, Le Corre Y, Cordel N, Dandurand M, Dereure O, Guillot B, DuThanh A, Bulai Livideanu C, Chasset F, Bouaziz JD, Frances C, Bengoufa D, Vincent T, Bessis D. Distinctive cutaneous and systemic features associated with specific antimyositis antibodies in adults with dermatomyositis: a prospective multicentric study of 117 patients. <i>Journal of the European Academy of Dermatology and Venereology</i> 2018; 32(7): 1164-1172.</p> | 2018 | France      | 3 | 117 | 17  | 7 |
| <p>Bhansing KJ, Lammens M, Knaapen HKA, van Riel PLCM, van Engelen BGM, Vonk MC. Scleroderma-polymyositis overlap syndrome versus idiopathic polymyositis and systemic sclerosis: a descriptive study on clinical features and myopathology. <i>Arthritis Research &amp; Therapy</i> 2014; 16(3): R111.</p>                                                                                                                                                                                                                                            | 2014 | Netherlands | 2 | 397 | 170 | 8 |
| <p>Bo L, LiMing C, CuiLi M, Ping L, LiQi B. Study on rheumatoid arthritis-associated interstitial lung disease in the elderly patients. In; 2012 2012: (var.pagings). 15 (SUPPL. 1) (pp 49); Blackwell Publishing; 2012.</p>                                                                                                                                                                                                                                                                                                                           | 2012 | China       | 1 | 565 | 50  | 8 |

|                                                                                                                                                                                                                                                                                                                                                                                 |      |              |   |     |     |   |
|---------------------------------------------------------------------------------------------------------------------------------------------------------------------------------------------------------------------------------------------------------------------------------------------------------------------------------------------------------------------------------|------|--------------|---|-----|-----|---|
| Bocchino M, Bruzzese D, D'Alto M, Argiento P, Borgia A, Capaccio A, Romeo E, Russo B, Sanduzzi A, Valente T, Sverzellati N, Rea G, Vettori S. Performance of a new quantitative computed tomography index for interstitial lung disease assessment in systemic sclerosis. <i>Scientific Reports</i> 2019; 9(1): 9468.                                                           | 2018 | Italy        | 2 | 83  | 39  | 8 |
| Bodolay E, Szekanez Z, Devenyi K, Galuska L, Csipo I, Vegh J, Garai I, Szegedi G. Evaluation of interstitial lung disease in mixed connective tissue disease (MCTD). <i>Rheumatology</i> 2005; 44(5): 656-661.                                                                                                                                                                  | 2005 | Hungary      | 5 | 144 | 96  | 8 |
| Buvry C, Cassagnes L, Tekath M, Artigues M, Pereira B, Rieu V, Le Guenno G, Tournadre A, Ruivard M, Grobost V. Anti-Ro52 antibodies are a risk factor for interstitial lung disease in primary Sjogren syndrome. <i>Respiratory medicine</i> 2020: 163(8908438, rme): 105895.                                                                                                   | 2020 | France       | 4 | 68  | 19  | 6 |
| Caimmi C, Bertoldo E, Venturini A, Caramaschi P, Frulloni L, Ciccocioppo R, Brunelli S, Idolazzi L, Gatti D, Viapiana O, Rossini M. Interstitial lung disease is independently associated with increased fecal calprotectin levels in systemic sclerosis. In; 2018 2018: 5th Systemic Sclerosis World Congress. France. 3 (Supplement 1) (pp 94); SAGE Publications Inc.; 2018. | 2018 | Italy        | 2 | 129 | 35  | 7 |
| Callejas-Moraga EL, Guillen-Del-Castillo A, Perurena-Prieto J, Sanz-Martinez MT, Fonollosa-Pla V, Lorite-Gomez K, Severino A, Bellocchi C, Beretta L, Mahler M, Simeon-Aznar CP. Anti-RNPC-3 antibody predicts poor prognosis in patients with interstitial lung disease associated to systemic sclerosis. <i>Rheumatology (Oxford)</i> 2021; 61(1): 154-162.                   | 2022 | Spain, Italy | 2 | 447 | 155 | 9 |
| Can G, Sarioglu S, Birlik M, Kenar G, Soysal O, Solmaz D, Gerdan V, Onen F, Akkoc N, Akar S. The prevalence of sjogren's syndrome and sicca symptoms in patients with systemic sclerosis and alpha-smooth muscle actin expression in biopsy specimens from minor salivary glands. <i>Turk J Med Sci</i> 2021; 51(4): 1875-1882.                                                 | 2021 | Turkey       | 2 | 102 | 35  | 8 |

|                                                                                                                                                                                                                                                                                                                                                                                    |      |        |         |     |     |   |
|------------------------------------------------------------------------------------------------------------------------------------------------------------------------------------------------------------------------------------------------------------------------------------------------------------------------------------------------------------------------------------|------|--------|---------|-----|-----|---|
| Castellanos-Moreira R, Rodriguez-Garcia SC, Gomara MJ, Ruiz-Esquide V, Cuervo A, Casafont-Sole I, Ramirez J, Holgado S, Gomez-Puerta JA, Canete JD, Haro I, Sanmarti R. Anti-carbamylated proteins antibody repertoire in rheumatoid arthritis: evidence of a new autoantibody linked to interstitial lung disease. <i>Annals of the Rheumatic Diseases</i> 2020(Journal Article). | 2020 | Spain  | 1       | 179 | 37  | 7 |
| Chan C, Ryerson CJ, Dunne JV, Wilcox PG. Demographic and clinical predictors of progression and mortality in connective tissue disease-associated interstitial lung disease: a retrospective cohort study. <i>BMC Pulmonary Medicine</i> 2019: 19(1): 192.                                                                                                                         | 2019 | Canada | 1, 2, 5 | 359 | 359 | 9 |
| Chan E, Kelly C, Woodhead FA, Nisar M, Arthanari S, Dawson J, Sathi N, Ahmad Y, Koduri G, Young A. Ra-related interstitial lung disease: Which factors predict its development? In; 2013 2013: (var.pagings). 52 (SUPPL. 1) (pp i75); Oxford University Press; 2013.                                                                                                               | 2013 | UK     | 1       | 230 | 230 | 7 |
| Chen J, Doyle TJ, Liu Y, Aggarwal R, Wang X, Shi Y, Ge SX, Huang H, Lin Q, Liu W, Cai Y, Koontz D, Fuhrman CR, Golzarri MF, Liu Y, Hatabu H, Nishino M, Araki T, Dellaripa PF, Oddis CV, Rosas IO, Ascherman DP. Biomarkers of rheumatoid arthritis-associated interstitial lung disease. <i>Arthritis rheumatol</i> 2015: 67(1): 28-38.                                           | 2015 | USA    | 1       | 133 | 41  | 8 |
| Chen J, Shi Y, Wang X, Huang H, Ascherman D. Asymptomatic preclinical rheumatoid arthritis-associated interstitial lung disease. <i>ClinDevImmunol</i> 2013: 2013(Journal Article): 406927.                                                                                                                                                                                        | 2013 | China  | 1       | 103 | 63  | 7 |
| Chen J, Song S, Liu Y, Liu D, Lin Y, Ge S, Ascherman DP. Autoreactive T cells to citrullinated HSP90 are associated with interstitial lung disease in rheumatoid arthritis. <i>International Journal of Rheumatic Diseases</i> 2018: 21(7): 1398-1405.                                                                                                                             | 2018 | China  | 1       | 66  | 24  | 7 |



|                                                                                                                                                                                                                                                                                                                                                                                                                                                                                         |      |            |   |     |     |   |
|-----------------------------------------------------------------------------------------------------------------------------------------------------------------------------------------------------------------------------------------------------------------------------------------------------------------------------------------------------------------------------------------------------------------------------------------------------------------------------------------|------|------------|---|-----|-----|---|
| Chen Q, Chen D-Y, Xu X-Z, Liu Y-Y, Yin T-T, Li D. Platelet/Lymphocyte, Lymphocyte/Monocyte, and Neutrophil/Lymphocyte Ratios as Biomarkers in Patients with Rheumatoid Arthritis and Rheumatoid Arthritis-Associated Interstitial Lung Disease. <i>MedSciMonit</i> 2019; 25(Journal Article): 6474-6481.                                                                                                                                                                                | 2019 | China      | 1 | 301 | 103 | 7 |
| Chua F, Highton AM, Colebatch AN, O'Reilly K, Grubnic S, Vlahos I, Edwards CJ, Kiely PDW. Idiopathic inflammatory myositis-associated interstitial lung disease: ethnicity differences and lung function trends in a British cohort. <i>Rheumatology</i> 2012; 51(10): 1870-1876.                                                                                                                                                                                                       | 2012 | UK         | 3 | 107 | 40  | 7 |
| Chua F, Highton AM, McNulty K, Grubnic S, Edwards EJ, Kiely PDW. Interstitial lung disease in the inflammatory myositides: Exacerbations of muscle disease are not paralleled by worsening of pulmonary function. In; 2009 2009: (var.pagings). 64 (SUPPL. 4) (pp A5-A6); BMJ Publishing Group; 2009.                                                                                                                                                                                   | 2009 | UK         | 3 | 47  | 20  | 7 |
| Coath F, Siddiqui S, Himashi A, Bharadwaj A, Dubey S, Hayes F, Koduri G. Does the presence of ILD influence the choice of DMARD and biologic therapy in rheumatoid arthritis? In; 2018 2018: Annual European Congress of Rheumatology, EULAR 2018. Netherlands. 77 (Supplement 2) (pp 1345); BMJ Publishing Group; 2018.                                                                                                                                                                | 2018 | Not Stated | 1 | 37  | 37  | 7 |
| Cobo-Ibanez T, Lopez-Longo F-J, Joven B, Carreira PE, Munoz-Fernandez S, Maldonado-Romero V, Larena-Grijalba C, Cubas IL, Muriel ET, Mateos CB, de la Pena Lefebvre PG, Gomez-Gomez A, Nogal LB, Perez A, Almodovar R, Lojo L, Ruiz-Gutierrez L, Lopez-Robledillo JC, Garcia de Yébenes MJ, Nuno-Nuno L. Long-term pulmonary outcomes and mortality in idiopathic inflammatory myopathies associated with interstitial lung disease. <i>Clinical rheumatology</i> 2019; 38(3): 803-815. | 2018 | Spain      | 3 | 478 | 129 | 8 |

|                                                                                                                                                                                                                                                                                                                                                        |      |         |   |     |    |   |
|--------------------------------------------------------------------------------------------------------------------------------------------------------------------------------------------------------------------------------------------------------------------------------------------------------------------------------------------------------|------|---------|---|-----|----|---|
| Cozzi F, Guarnieri G, Zanatta E, Pigatto E, Favaro M, Cardarelli S, Maestrelli P, Punzi L. Capillary blood volume measurement in scleroderma patients submitted to nitric oxide diffusion test. In; 2012 2012: (var.pagings). 51 (SUPPL. 2) (pp ii104); Oxford University Press; 2012.                                                                 | 2012 | Italy   | 2 | 37  | 12 | 7 |
| D'Andrea A, D'Alto M, Di Maio M, Vettori S, Benjamin N, Cocchia R, Argiento P, Romeo E, Di Marco G, Russo MG, Valentini G, Calabro R, Bossone E, Grunig E. Right atrial morphology and function in patients with systemic sclerosis compared to healthy controls: a two-dimensional strain study. <i>Clinical rheumatology</i> 2016: 35(7): 1733-1742. | 2016 | Germany | 2 | 90  | 48 | 7 |
| Daldoul C, El Amri N, Guiga A, Laataoui S, Baccouche K, Zegaloui H, Bouajina E. Usual interstitial pneumonia during rheumatoid arthritis: Prevalence and associated factors. <i>Annals of the Rheumatic Diseases</i> 2021: 80(SUPPL 1): 526-527.                                                                                                       | 2021 | Tunisia | 1 | 59  | 33 | 9 |
| Dawson JK, Fewins HE, Desmond J, Lynch MP, Graham DR. Fibrosing alveolitis in patients with rheumatoid arthritis as assessed by high resolution computed tomography, chest radiography, and pulmonary function tests. <i>Thorax</i> 2001: 56(8): 622-627.                                                                                              | 2001 | UK      | 1 | 150 | 28 | 7 |
| De Santis M, Bosello SL, Peluso G, Pinnelli M, Alivernini S, Zizzo G, Bocci M, Capacci A, La Torre G, Mannocci A, Pagliari G, Varone F, Pistelli R, Danza FM, Ferraccioli G. Bronchoalveolar lavage fluid and progression of scleroderma interstitial lung disease. <i>ClinRespirJ</i> 2012: 6(1): 9-17.                                               | 2012 | Italy   | 2 | 110 | 73 | 7 |
| Debray MP, Borie R, Revel MP, Naccache JM, Khalil A, Toper C, IsraelBiet D, Estellat C, Brillet PY. Interstitial lung disease in anti-synthetase syndrome: Initial and follow-up CT findings. <i>EurJRadiol</i> 2015: 84(3): 516-523.                                                                                                                  | 2015 | France  | 3 | 33  | 33 | 8 |

|                                                                                                                                                                                                                                                                                                                                                                                                                          |      |         |   |      |     |   |
|--------------------------------------------------------------------------------------------------------------------------------------------------------------------------------------------------------------------------------------------------------------------------------------------------------------------------------------------------------------------------------------------------------------------------|------|---------|---|------|-----|---|
| Del Angel-Pablo AD, Buendia-Roldan I, Mejia M, Perez-Rubio G, Nava-Quiroz KJ, Rojas-Serrano J, Falfan-Valencia R. Anti-HLA Class II Antibodies Correlate with C-Reactive Protein Levels in Patients with Rheumatoid Arthritis Associated with Interstitial Lung Disease. <i>Cells</i> 2020: 9(3).                                                                                                                        | 2020 | Mexico  | 1 | 147  | 65  | 7 |
| Dobrota I, Petcu A, Rednic S. Pulmonary involvement in SSc patients - A single centre experience. In: 2014 2014: (var.pagings). 32 (2 SUPPL. 81) (pp S85); <i>Clinical and Experimental Rheumatology S.A.S.</i> ; 2014.                                                                                                                                                                                                  | 2014 | Romania | 2 | 42   | 33  | 7 |
| Duarte AC, Porter JC, Leandro MJ. The lung in a cohort of rheumatoid arthritis patients-an overview of different types of involvement and treatment. <i>Rheumatology (United Kingdom)</i> 2019: 58(11): 2031-2038.                                                                                                                                                                                                       | 2019 | UK      | 1 | 1129 | 45  | 7 |
| Elhai M, Hoffmann-Vold AM, Avouac J, Pezet S, Cauvet A, Leblond A, Fretheim H, Garen T, Kuwana M, Molberg O, Allanore Y. Performance of Candidate Serum Biomarkers for Systemic Sclerosis-Associated Interstitial Lung Disease. <i>Arthritis rheumatol</i> 2019: 71(6): 972-982.                                                                                                                                         | 2019 | France  | 2 | 427  | 234 | 8 |
| Emilie S, Goulvestre C, Berezne A, Pagnoux C, Guillevin L, Mouthon L. Anti-RNA polymerase III antibodies are associated with scleroderma renal crisis in a French cohort. <i>Scandinavian journal of rheumatology</i> 2011: 40(5): 404-406.                                                                                                                                                                              | 2011 | France  | 2 | 195  | 70  | 7 |
| Enomoto N, Egashira R, Tabata K, Hashisako M, Kitani M, Waseda Y, Ishizuka T, Watanabe S, Kasahara K, Izumi S, Shiraki A, Miyamoto A, Kishi K, Kishaba T, Sugimoto C, Inoue Y, Kataoka K, Kondoh Y, Tsuchiya Y, Baba T, Sugiura H, Tanaka T, Sumikawa H, Suda T. Analysis of systemic lupus erythematosus-related interstitial pneumonia: a retrospective multicentre study. <i>Scientific Reports</i> 2019: 9(1): 7355. | 2019 | Japan   | 6 | 55   | 55  | 7 |

|                                                                                                                                                                                                                                                                                                                                                                                                                                                                                           |      |           |   |      |     |   |
|-------------------------------------------------------------------------------------------------------------------------------------------------------------------------------------------------------------------------------------------------------------------------------------------------------------------------------------------------------------------------------------------------------------------------------------------------------------------------------------------|------|-----------|---|------|-----|---|
| Eroglu DS, Colaklar A, Baysal S, Torgutalp M, Baygul A, Sezer S, Guloksuz EA, Yuksel M, Yayla M, Yurteri EU, Uzun C, Kumbasar OO, Turgay M, Gulay K, Ates A. Prevalence and predictors of mortality in rheumatoid arthritis-related lung disease: Results from a single center study. <i>Arthritis Rheum</i> 2021; 73(SUPPL 9): 590-592.                                                                                                                                                  | 2021 | Turkey    | 1 | 9756 | 107 | 7 |
| Escola-Verge L, Pinal-Fernandez I, Fernandez-Codina A, Callejas-Moraga EL, Espinosa J, Marin A, Labrador-Horrillo M, Selva-O'Callaghan A. Mixed Connective Tissue Disease and Epitope Spreading: An Historical Cohort Study. <i>Jclinrheumatol</i> 2017; 23(3): 155-159.                                                                                                                                                                                                                  | 2017 | USA       | 5 | 40   | 10  | 7 |
| Fadda S, Khairy N, Fayed H, Mousa H, Taha R. Interstitial lung disease in Egyptian patients with rheumatoid arthritis: Frequency, pattern and correlation with clinical manifestations and anti-citrullinated peptide antibodies level. <i>Egyptian Rheumatologist</i> 2018; 40(3): 155-160.                                                                                                                                                                                              | 2017 | Egypt     | 1 | 88   | 63  | 2 |
| Fagundes MN, Caleiro MTC, NavarroRodriguez T, Baldi BG, Kavakama J, Salge JM, Kairalla R, Carvalho CRR. Esophageal involvement and interstitial lung disease in mixed connective tissue disease. <i>Respiratory medicine</i> 2009; 103(6): 854-860.                                                                                                                                                                                                                                       | 2009 | Brazil    | 5 | 50   | 39  | 4 |
| Fava A, Cimbro R, Wigley FM, Liu Q-R, Rosen A, Boin F. Frequency of circulating topoisomerase-I-specific CD4 T cells predicts presence and progression of interstitial lung disease in scleroderma. <i>Arthritis Research &amp; Therapy</i> 2016; 18(1): 99.                                                                                                                                                                                                                              | 2016 | USA       | 2 | 27   | 11  | 5 |
| Flores J, Baenas D, Riscanevo N, Saad E, Salinas MJH, Retamozo S, Alvarez AC, Alvarellos A, Pirola JP, Benzaquen N, Saurit V, Caeiro F. Lung involvement in primary Sjogren's syndrome: Spectrum of pulmonary abnormalities and computed tomography findings. In; 2018 2018: American College of Rheumatology/Association of Rheumatology Health Professionals Annual Scientific Meeting, ACR/ARHP 2018. United States. 70 (Supplement 9) (pp 2448-2449); John Wiley and Sons Inc.; 2018. | 2018 | Argentina | 4 | 197  | 19  | 7 |

|                                                                                                                                                                                                                                                                                                                                                                                                                   |      |          |   |     |     |   |
|-------------------------------------------------------------------------------------------------------------------------------------------------------------------------------------------------------------------------------------------------------------------------------------------------------------------------------------------------------------------------------------------------------------------|------|----------|---|-----|-----|---|
| Font CV, Nieto MA, Leon L, RodriguezRodriguez L, Urgelles JF, Cour EP, Jover JA, Alcazar LA. Mortality and clinical features in rheumatoid arthritis and interstitial lung disease. In; 2017 2017: American College of Rheumatology/Association of Rheumatology Health Professionals Annual Scientific Meeting, ACR/ARHP 2017. United States. 69 (Supplement 10) (no pagination); John Wiley and Sons Inc.; 2017. | 2017 | Spain    | 1 | 31  | 31  | 6 |
| Foocharoen C, Peansukwech U, Mahakkanukrauh A, Suwannaroj S, Pongkulkiat P, Khamphiw P, Nanagara R. Clinical characteristics and outcomes of 566 Thais with systemic sclerosis: A cohort study. <i>International journal of rheumatic diseases</i> 2020; 23(7): 945-957.                                                                                                                                          | 2020 | Thailand | 2 | 566 | 265 | 8 |
| Fotoh DS, Helal A, Rizk MS, Esaily HA. Serum Krebs von den Lungen-6 and lung ultrasound B lines as potential diagnostic and prognostic factors for rheumatoid arthritis-associated interstitial lung disease. <i>Clinical rheumatology</i> 2021; 40(7): 2689-2697.                                                                                                                                                | 2021 | Egypt    | 1 | 150 | 75  | 5 |
| Fu Q, Zheng Y. Risk factors for progression and prognosis of rheumatoid arthritis-associated interstitial lung disease: Single centre study with a large sample of Chinese population. In; 2018 2018: Annual European Congress of Rheumatology, EULAR 2018. Netherlands. 77 (Supplement 2) (pp 1326); BMJ Publishing Group; 2018.                                                                                 | 2018 | China    | 1 | 266 | 266 | 9 |
| Fui A, Bergantini L, Selvi E, Mazzei MA, Bennett D, Pieroni MG, Rottoli P, Bargagli E. Rituximab therapy in interstitial lung disease associated with rheumatoid arthritis. <i>InternMedJ</i> 2020; 50(3): 330-336.                                                                                                                                                                                               | 2019 | Italy    | 1 | 28  | 28  | 5 |
| Fujita Y, Asano T, Matsuoka N, Temmoku J, Sato S, Matsumoto H, Furuya MY, Suzuki E, Watanabe H, Kawakami A, Migita K. Differential regulation and correlation between galectin-9 and anti-CCP antibody (ACPA) in rheumatoid arthritis patients. <i>Arthritis research &amp; therapy</i> 2020; 22(1): 80.                                                                                                          | 2020 | Japan    | 1 | 116 | 31  | 6 |

|                                                                                                                                                                                                                                                                                                                                                       |      |             |   |     |    |   |
|-------------------------------------------------------------------------------------------------------------------------------------------------------------------------------------------------------------------------------------------------------------------------------------------------------------------------------------------------------|------|-------------|---|-----|----|---|
| Fukamatsu H, Hirai Y, Miyake T, Kaji T, Morizane S, Yokoyama E, Hamada T, Oono T, Koyama Y, Norikane S, Iwatsuki K. Clinical manifestations of skin, lung and muscle diseases in dermatomyositis positive for anti-aminoacyl tRNA synthetase antibodies. <i>JDermatol</i> 2019; 46(10): 886-897.                                                      | 2019 | Japan       | 3 | 59  | 27 | 4 |
| Gao M-Z, Wei Y-Y, Xu Q-W, Ji R, Han Z-J, Jiang T-W. Elevated serum YKL-40 correlates with clinical characteristics in patients with polymyositis or dermatomyositis. <i>AnnClinBiochem</i> 2019; 56(1): 95-99.                                                                                                                                        | 2019 | China       | 5 | 99  | 23 | 6 |
| Gautam M, Masood MJ, Arooj S, Mahmud M-EH, Mukhtar MU. Rheumatoid Arthritis Related Interstitial Lung Disease: Patterns of High-resolution Computed Tomography. <i>Cureus</i> 2020; 12(2): e6875.                                                                                                                                                     | 2020 | Pakistan    | 1 | 54  | 25 | 3 |
| Giles JT, Danoff SK, Sokolove J, Wagner CA, Winchester R, Pappas DA, Siegelman S, Connors G, Robinson WH, Bathon JM. Association of fine specificity and repertoire expansion of anticitrullinated peptide antibodies with rheumatoid arthritis associated interstitial lung disease. <i>Annals of the Rheumatic Diseases</i> 2014; 73(8): 1487-1494. | 2014 | USA         | 1 | 177 | 57 | 6 |
| Go DJ, Lee EY, Lee EB, Song YW, Konig MF, Park JK. Elevated Erythrocyte Sedimentation Rate Is Predictive of Interstitial Lung Disease and Mortality in Dermatomyositis: a Korean Retrospective Cohort Study. <i>JKorean MedSci</i> 2016; 31(3): 389-396.                                                                                              | 2016 | South Korea | 3 | 114 | 53 | 7 |
| Gonzalez Fernandez I, Moriano C, Diez Alvarez E, Larco Rojas XE, Lopez Robles A, Vallejo Pascual ME, Perez Sandoval MT. Interstitial lung involvement in systemic lupus erythematosus: Relevant clinical characteristics. Our experience in a third level hospital. <i>Annals of the Rheumatic Diseases</i> 2021; 80(SUPPL 1): 628-629.               | 2021 | Spain       | 6 | 455 | 20 | 8 |
| Guiot J, Njock M-S, Andre B, Gester F, Henket M, de Seny D, Moermans C, Malaise MG, Louis R. Serum IGF1BP-2 in systemic sclerosis as a prognostic factor of lung dysfunction. <i>Scientific reports</i> 2021; 11(1): 10882.                                                                                                                           | 2021 | Belgium     | 2 | 102 | 39 | 6 |

|                                                                                                                                                                                                                                                                                                   |      |         |   |     |     |   |
|---------------------------------------------------------------------------------------------------------------------------------------------------------------------------------------------------------------------------------------------------------------------------------------------------|------|---------|---|-----|-----|---|
| <p>Gunther F, Straub RH, Hartung W, Luchner A, Fleck M, Ehrenstein B. Increased Serum Levels of soluble ST2 as a Predictor of Disease Progression in Systemic Sclerosis. <i>Scandinavian journal of rheumatology</i> 2022; 51(4): 315-322.</p>                                                    | 2022 | Germany | 2 | 49  | 25  | 7 |
| <p>Hall JC, Casciola-Rosen L, Samedy L-A, Werner J, Owoyemi K, Danoff SK, Christopher-Stine L. Anti-melanoma differentiation-associated protein 5-associated dermatomyositis: expanding the clinical spectrum. <i>Arthritis CareRes(Hoboken)</i> 2013; 65(8): 1307-1315.</p>                      | 2013 | USA     | 3 | 160 | 25  | 5 |
| <p>Hanaka T, Kido T, Ishimoto H, Oda K, Noguchi S, Nawata A, Nakayamada S, Sakamoto N, Tanaka Y, Yatera K, Mukae H. Radiological patterns of pulmonary involvement may predict treatment response in rheumatoid arthritis: A retrospective study. <i>RespirInvestig</i> 2019; 57(2): 172-182.</p> | 2019 | Japan   | 1 | 77  | 77  | 7 |
| <p>Hax V, Bredemeier M, Didonet Moro AL, Pavan TR, Vieira MV, Pitrez EH, da Silva Chakr RM, Xavier RM. Clinical algorithms for the diagnosis and prognosis of interstitial lung disease in systemic sclerosis. <i>SeminArthritis Rheum</i> 2017; 47(2): 228-234.</p>                              | 2017 | Brazil  | 2 | 177 | 101 | 6 |
| <p>Hayashi S, Tanaka M, Kobayashi H, Nakazono T, Satoh T, Fukuno Y, Aragane N, Tada Y, Koarada S, Ohta A, Nagasawa K. High-resolution computed tomography characterization of interstitial lung diseases in polymyositis/dermatomyositis. <i>JRheumatol</i> 2008; 35(2): 260-269.</p>             | 2007 | Japan   | 3 | 55  | 33  | 8 |
| <p>Hizal M, Bruni C, Romano E, Mazzotta C, Guiducci S, Bellando Randone S, Blagojevic J, Lepri G, Tufan A, Matucci Cerinic M. Decrease of LL-37 in systemic sclerosis: a new marker for interstitial lung disease? <i>Clinical rheumatology</i> 2015; 34(4): 795-798.</p>                         | 2015 | Italy   | 2 | 58  | 30  | 6 |

|                                                                                                                                                                                                                                                                                                                                                                                                                                                                                                                                                                                                                                       |      |         |   |     |     |   |
|---------------------------------------------------------------------------------------------------------------------------------------------------------------------------------------------------------------------------------------------------------------------------------------------------------------------------------------------------------------------------------------------------------------------------------------------------------------------------------------------------------------------------------------------------------------------------------------------------------------------------------------|------|---------|---|-----|-----|---|
| Hoang-Duc H, Pham-Huy Q, Vu-Minh T, Duong-Quy S. Study of the correlation between HRCT semi-quantitative scoring, concentration of alveolar nitric oxide, and clinical-functional parameters of systemic sclerosis-induced interstitial lung disease. <i>Yale J Biol Med</i> 2020: 93(5): 657-667.                                                                                                                                                                                                                                                                                                                                    | 2020 | Vietnam | 2 | 74  | 41  | 6 |
| Hoffmann-Vold A-M, Fretheim H, Halse A-K, Seip M, Bitter H, Wallenius M, Garen T, Salberg A, Brunborg C, Midtvedt O, Lund MB, Aalokken TM, Molberg O. Tracking Impact of Interstitial Lung Disease in Systemic Sclerosis in a Complete Nationwide Cohort. <i>AmJRespirCritCare Med</i> 2019: 200(10): 1258-1266.                                                                                                                                                                                                                                                                                                                      | 2019 | Norway  | 2 | 815 | 326 | 9 |
| Hozumi H, Enomoto N, Kono M, Fujisawa T, Inui N, Nakamura Y, Sumikawa H, Johkoh T, Nakashima R, Imura Y, Mimori T, Suda T. Prognostic significance of anti-aminoacyl-tRNA synthetase antibodies in polymyositis/dermatomyositis-associated interstitial lung disease: a retrospective case control study. <i>PLoS ONE [Electronic Resource]</i> 2015: 10(3): e0120313.                                                                                                                                                                                                                                                                | 2015 | Japan   | 3 | 48  | 48  | 8 |
| Hu S, Hou Y, Wang Q, Li M, Xu D, Zeng X. Prognostic profile of systemic sclerosis: analysis of the clinical EUSTAR cohort in China. <i>Arthritis Research &amp; Therapy</i> 2018: 20(1): 235.                                                                                                                                                                                                                                                                                                                                                                                                                                         | 2018 | China   | 2 | 448 | 358 | 6 |
| Iniesta Arandia N, Simeon-Aznar CP, Guillen Del Castillo A, Colunga Arguelles D, Rubio-Rivas M, Trapiella Martinez L, Garcia Hernandez FJ, Saez Comet L, Egurbide Arberas MV, Ortego-Centeno N, Freire M, Mari Alfonso B, Vargas Hitos JA, Rios Blanco JJ, Todoli Parra JA, Rodriguez-Carballeira M, Marin Ballve A, Chamorro Fernandez AJ, Pla Salas X, Madronero Vuelta AB, Ruiz Munoz M, Fonollosa Pla V, Espinosa G, Rescle investigators AD SG. Influence of antibody profile in clinical features and prognosis in a cohort of Spanish patients with systemic sclerosis. <i>ClinExpRheumatol</i> 2017: 35(Suppl 106(4): 98-105. | 2017 | Spain   | 2 | 209 | 81  | 8 |



|                                                                                                                                                                                                                                                                                                                                                                            |      |                |      |      |     |   |
|----------------------------------------------------------------------------------------------------------------------------------------------------------------------------------------------------------------------------------------------------------------------------------------------------------------------------------------------------------------------------|------|----------------|------|------|-----|---|
| Ishizuka M, Watanabe R, Ishii T, Machiyama T, Akita K, Fujita Y, Shiota Y, Fujii H, Harigae H. Long-term follow-up of 124 patients with polymyositis and dermatomyositis: Statistical analysis of prognostic factors. <i>Modern Rheumatology</i> 2016; 26(1): 115-120.                                                                                                     | 2016 | Japan          | 3    | 124  | 76  | 7 |
| Izuka S, Yamashita H, Iba A, Takahashi Y, Kaneko H. Acute exacerbation of rheumatoid arthritis-associated interstitial lung disease: clinical features and prognosis. <i>Rheumatology (Oxford)</i> 2021; 60(5): 2348-2354.                                                                                                                                                 | 2021 | Japan          | 1    | 1325 | 165 | 7 |
| Jacob J, Hirani N, van Moorsel CHM, Rajagopalan S, Murchison JT, van Es HW, Bartholmai BJ, van Beek FT, Struik MHL, Stewart GA, Kokosi M, Egashira R, Brun AL, Cross G, Barnett J, Devaraj A, Margaritopoulos G, Karwoski R, Renzoni E, Maher TM, Wells AU. Predicting outcomes in rheumatoid arthritis related interstitial lung disease. <i>Eur Respir J</i> 2019; 53(1) | 2019 | United Kingdom | 1    | 157  | 157 | 9 |
| Jantarat A, Muangchan C. Epidemiology and clinical characteristics of systemic sclerosis overlap syndrome (SSc-OS), and the factors significantly associated with SSc-OS in Thai patients with systemic sclerosis. <i>Modern rheumatology</i> 2021(100959226).                                                                                                             | 2021 | Thailand       | 2    | 152  | 88  | 7 |
| Jayasinghe P, Wickramasinghe N, Krishnakumar P, Sadikeen A, Fernando A. Characteristics of Connective Tissue Diseases Associated Interstitial Lung Diseases - A Single Centre Study in Sri Lanka. <i>Ceylon Med J</i> 2021; 66(1): 38-43.                                                                                                                                  | 2021 | Sri Lanka      | 1, 2 | 83   | 75  | 9 |
| Jinta T, Okada M, Ishikawa G, Yamano Y, Tomishima Y, Uchiyama N, Nishimura N, Chohnabayashi N. Interstitial lung disease in systemic sclerosis: A comparison between limited cutaneous systemic sclerosis and diffuse cutaneous systemic sclerosis. In; 2012 2012: (var.pagings). 185 (MeetingAbstracts) (no pagination); American Thoracic Society; 2012.                 | 2012 | Japan          | 2    | 157  | 64  | 1 |

|                                                                                                                                                                                                                                                                                                                                                                                                                                                                                                                                                                                                                                                                                                                                                                                                                                                                   |      |                                       |   |      |     |   |
|-------------------------------------------------------------------------------------------------------------------------------------------------------------------------------------------------------------------------------------------------------------------------------------------------------------------------------------------------------------------------------------------------------------------------------------------------------------------------------------------------------------------------------------------------------------------------------------------------------------------------------------------------------------------------------------------------------------------------------------------------------------------------------------------------------------------------------------------------------------------|------|---------------------------------------|---|------|-----|---|
| Johnson C, Pinal Fernandez I, Paik J, Albayda M, Mammen A, ChristopherStine L, Danoff S. Assessment of mortality in autoimmune myositis with and without associated interstitial lung disease. In; 2014 2014: (var.pagings). 189 (MeetingAbstracts) (no pagination); American Thoracic Society; 2014.                                                                                                                                                                                                                                                                                                                                                                                                                                                                                                                                                             | 2016 | USA                                   | 3 | 831  | 94  | 8 |
| Juge P-A, Lee JS, Lau J, Kawano-Dourado L, Rojas Serrano J, Sebastiani M, Koduri G, Matteson E, Bonfiglioli K, Sawamura M, Kairalla R, Cavagna L, Bozzalla Cassione E, Manfredi A, Mejia M, Rodriguez-Henriquez P, Gonzalez-Perez MI, Falfan-Valencia R, Buendia-Roldan I, Perez-Rubio G, Ebstein E, Gazal S, Borie R, Ottaviani S, Kannengiesser C, Wallaert B, Uzunhan Y, Nunes H, Valeyre D, Sainenberg-Kermanac'h N, Boissier M-C, Wemeau-Stervinou L, Flipo R-M, Marchand-Adam S, Richette P, Allanore Y, Dromer C, Truchetet M-E, Richez C, Schaeverbeke T, Liote H, Thabut G, Deane KD, Solomon JJ, Doyle T, Ryu JH, Rosas I, Holers VM, Boileau C, Debray M-P, Porcher R, Schwartz DA, Vassallo R, Crestani B, Dieude P. Methotrexate and rheumatoid arthritis associated interstitial lung disease. <i>The European respiratory journal</i> 2021: 57(2). | 2021 | France, Italy, UK, Mexico, Brazil, US | 1 | 1083 | 410 | 7 |
| Juge PA, Wemeau L, MarchandAdam S, Debray MP, Nunes H, Gazal S, Ottaviani S, Schaeverbeke T, Sainenberg N, Valeyre D, Thabut G, Boissier MC, Dunogeant L, Allanore Y, Richez C, Flipo RM, Wallaert B, Richette P, Cottin V, Sibilia J, Borie R, Coustet B, Liote H, Soubrier M, Frazier A, Crestani B, Dieude P. Identification of markers associated with the occurrence of interstitial lung disease in rheumatoid arthritis patients. In; 2016 2016: Annual European Congress of Rheumatology of the European League Against Rheumatism, EULAR 2016. United Kingdom. 75 (Supplement 2) (pp 218); BMJ Publishing Group; 2016.                                                                                                                                                                                                                                   | 2016 | France                                | 1 | 253  | 138 | 4 |
| Jung E, Suh C-H, Kim H-A, Jung J-Y. Clinical Characteristics of Systemic Sclerosis With Interstitial Lung Disease. <i>Archives of Rheumatology</i> 2018: 33(3): 322-327.                                                                                                                                                                                                                                                                                                                                                                                                                                                                                                                                                                                                                                                                                          | 2018 | Korea                                 | 2 | 108  | 43  | 6 |

|                                                                                                                                                                                                                                                                                                                                                                                                                                                                                                                                               |      |            |   |     |     |   |
|-----------------------------------------------------------------------------------------------------------------------------------------------------------------------------------------------------------------------------------------------------------------------------------------------------------------------------------------------------------------------------------------------------------------------------------------------------------------------------------------------------------------------------------------------|------|------------|---|-----|-----|---|
| <p>Kakugawa T, Sakamoto N, Ishimoto H, Shimizu T, Nakamura H, Nawata A, Ito C, Sato S, Hanaka T, Oda K, Kido T, Miyamura T, Nakashima S, Aoki T, Nakamichi S, Obase Y, Saito K, Yatera K, Ishimatsu Y, Nakayama T, Korogi Y, Kawakami A, Tanaka Y, Mukae H. Lymphocytic focus score is positively related to airway and interstitial lung diseases in primary Sjogren's syndrome. <i>Respiratory medicine</i> 2018; 137(Journal Article): 95-102.</p>                                                                                         | 2018 | Japan      | 4 | 101 | 32  | 6 |
| <p>Kang J, Kim H, Ahn GY, Jeong SA, Kim HW, Choi CB, Kim TH, Jun JB, Bae SC, Yoo D, Park DW, Sohn JW, Yoon HJ, Hong SJ, Choi YW, Lee Y, Kim SH, Cho SK, Sung YK. Establishment of a prospective cohort for rheumatoid arthritis patients with interstitial lung disease: Comparison of baseline characteristics between rheumatoid arthritis patient with or without interstitial lung disease. In; 2019 2019: Annual European Congress of Rheumatology, EULAR 2019. Spain. 78 (Supplement 2) (pp 2097-2098); BMJ Publishing Group; 2019.</p> | 2019 | Not stated | 1 | 313 | 74  | 5 |
| <p>Kang J, Seo WJ, Lee EY, Chang SH, Choe J, Hong S, Song JW. Pleuroparenchymal fibroelastosis in rheumatoid arthritis-associated interstitial lung disease. <i>Respir Res</i> 2022; 23(1): 143.</p>                                                                                                                                                                                                                                                                                                                                          | 2022 | Korea      | 1 | 477 | 477 | 8 |
| <p>Kawashiri S-Y, Nishino A, Igawa T, Takatani A, Shimizu T, Umeda M, Fukui S, Okada A, Suzuki T, Koga T, Iwamoto N, Ichinose K, Tamai M, Nakashima M, Mizokami A, Matsuoka N, Migita K, Ogawa F, Ikeda S, Maemura K, Nakamura H, Origuchi T, Maeda T, Kawakami A. Prediction of organ involvement in systemic sclerosis by serum biomarkers and peripheral endothelial function. <i>ClinExpRheumatol</i> 2018; 36(Suppl 113(4): 102-108.</p>                                                                                                 | 2018 | Japan      | 2 | 60  | 24  | 7 |

|                                                                                                                                                                                                                                                                                                                                                                                                                                |      |                |   |     |     |   |
|--------------------------------------------------------------------------------------------------------------------------------------------------------------------------------------------------------------------------------------------------------------------------------------------------------------------------------------------------------------------------------------------------------------------------------|------|----------------|---|-----|-----|---|
| <p>Kelly C, Chan E, Nisar M, Arthanari S, Woodhead F, Dawson J, Sathi N, Ahmad Y. Rheumatoid arthritis related interstitial lung disease-relevance of lung function tests and high resolution computed tomography in a large multi centre series. In; 2013 2013: (var.pagings). 72 (SUPPL. 3) (no pagination); BMJ Publishing Group; 2013.</p>                                                                                 | 2013 | United Kingdom | 1 | 159 | 159 | 3 |
| <p>Kelly CA, Saravanan V, Nisar M, Arthanari S, Woodhead FA, PriceForbes AN, Dawson J, Sathi N, Ahmad Y, Koduri G, Young A. Rheumatoid arthritis-related interstitial lung disease: Associations, prognostic factors and physiological and radiological characteristics-a large multicentre UK study. <i>Rheumatology (United Kingdom)</i> 2014: 53(9) (pp 1676-1682): Arte-Number: keu165. ate of Pubaton: Setember 2014.</p> | 2014 | United Kingdom | 1 | 460 | 230 | 7 |
| <p>Kim EJ, Elicker BM, Maldonado F, Webb WR, Ryu JH, Van Uden JH, Lee JS, King Jr TE, Collard HR. Usual interstitial pneumonia in rheumatoid arthritis-associated interstitial lung disease. <i>European Respiratory Journal</i> 2010: 35(6): 1322-1328.</p>                                                                                                                                                                   | 2010 | USA            | 1 | 82  | 82  | 6 |
| <p>Kim YJ, Choe J, Kim HJ, Song JW. Long-term clinical course and outcome in patients with primary Sjogren syndrome-associated interstitial lung disease. <i>Scientific reports</i> 2021: 11(1): 12827.</p>                                                                                                                                                                                                                    | 2021 | Korea          | 4 | 62  | 62  | 8 |
| <p>Klester E, Klester K, Shoykhet Y, Elykomov V, Yarkova V, Berdyugina A, Mukhtarova E. Risk factors of interstitial lung diseases in patients with rheumatoid arthritis. In; 2019 2019: 29th International Congress of the European Respiratory Society, ERS. Spain. 54 (Supplement 63) (no pagination); European Respiratory Society; 2019.</p>                                                                              | 2019 | Russia         | 1 | 167 | 26  | 4 |

|                                                                                                                                                                                                                                                                                                                                                               |      |        |   |     |     |   |
|---------------------------------------------------------------------------------------------------------------------------------------------------------------------------------------------------------------------------------------------------------------------------------------------------------------------------------------------------------------|------|--------|---|-----|-----|---|
| Kondoh Y, Johkoh T, Fukuoka J, Arakawa H, Tanaka T, Watanabe N, Sakamoto K, Kataoka K, Kimura T, Taniguchi H. Broader criteria of undifferentiated connective tissue disease in idiopathic interstitial pneumonias. <i>Respiratory medicine</i> 2015; 109(3): 389-396.                                                                                        | 2015 | Japan  | 7 | 24  | 24  | 4 |
| Kronzer VL, Huang W, Dellaripa PF, Huang S, Feathers V, Lu B, Iannaccone CK, Gill RR, Hatabu H, Nishino M, Crowson CS, Davis JM, 3rd, Weinblatt ME, Shadick NA, Doyle TJ, Sparks JA. Lifestyle and Clinical Risk Factors for Incident Rheumatoid Arthritis-associated Interstitial Lung Disease. <i>J Rheumatol</i> 2021; 48(5): 656-663.                     | 2021 | USA    | 1 | 317 | 84  | 7 |
| Kubo S, Siebuhr AS, Bay-Jensen A-C, Juhl P, Karsdal MA, Satoh Y, Todoroki Y, Nakano K, Nakayamada S, Tanaka Y. Correlation between serological biomarkers of extracellular matrix turnover and lung fibrosis and pulmonary artery hypertension in patients with systemic sclerosis. <i>International Journal of Rheumatic Diseases</i> 2020(Journal Article). | 2020 | Japan  | 2 | 79  | 37  | 4 |
| KurZalewska J, Tlustochowicz M, Tlustochowicz W. Risk factors of interstitial lung disease in patients with rheumatoid arthritis. In; 2013 2013: (var.pagings). 71 (SUPPL. 3) (no pagination); BMJ Publishing Group; 2013.                                                                                                                                    | 2013 | Poland | 1 | 111 | 53  | 6 |
| Lai N-L, Jia W, Wang X, Luo J, Liu G-Y, Gao C, Li X-F, Xie J-F. Risk Factors and Changes of Peripheral NK and T Cells in Pulmonary Interstitial Fibrosis of Patients with Rheumatoid Arthritis. <i>CanRespirJ</i> 2019: 2019(Journal Article): 7262065.                                                                                                       | 2019 | China  | 1 | 200 | 100 | 6 |
| Lee JS, Ghang B, Choi W, Hong S, Kim Y-G, Lee C-K, Nam SJ, Yoo B. Expression of Inflammatory Markers in the Muscles of Patients with Idiopathic Inflammatory Myopathy According to the Presence of Interstitial Lung Disease. <i>J Clin Med</i> 2022: 11(11).                                                                                                 | 2022 | Korea  | 3 | 129 | 49  | 8 |

|                                                                                                                                                                                                                                                                                                                                                                                                             |      |       |   |      |     |   |
|-------------------------------------------------------------------------------------------------------------------------------------------------------------------------------------------------------------------------------------------------------------------------------------------------------------------------------------------------------------------------------------------------------------|------|-------|---|------|-----|---|
| Lee K-A, Choi W, Kim J, Lee S-H, Kim H-R, Kim H-S. Elderly-onset primary Sjogren's syndrome focused on clinical and salivary gland ultrasonographic features. <i>Joint Bone Spine</i> 2021; 88(4): 105132.                                                                                                                                                                                                  | 2021 | Korea | 4 | 221  | 43  | 7 |
| Li L, Liu R, Zhang Y, Zhou J, Li Y, Xu Y, Gao S, Zheng Y. A retrospective study on the predictive implications of clinical characteristics and therapeutic management in patients with rheumatoid arthritis-associated interstitial lung disease. <i>Clinical rheumatology</i> 2019(Journal Article).                                                                                                       | 2019 | China | 1 | 923  | 278 | 9 |
| Li L, Wang H, Wang Q, Wu C, Liu C, Zhang Y, Cheng L, Zeng X, Zhang F, Li Y. Myositis-specific autoantibodies in dermatomyositis/polymyositis with interstitial lung disease. <i>JNeuroSci</i> 2019; 397(Journal Article): 123-128.                                                                                                                                                                          | 2019 | China | 3 | 130  | 79  | 4 |
| Li X, Wang Y. Soluble CD163 levels are elevated in patients with rheumatoid arthritis and associated with interstitial lung disease. In; 2016 2016: 18th Asia Pacific League of Associations for Rheumatology Congress, APLAR. China. 19 (Supplement 2) (pp 200); Blackwell Publishing; 2016.                                                                                                               | 2016 | China | 1 | 66   | 34  | 4 |
| Liu L, Fang C, Sun B, Bao R, Zhang H. Predictors of progression in rheumatoid arthritis-associated interstitial lung disease: A single-center retrospective study from China. <i>International journal of rheumatic diseases</i> 2022(101474930).                                                                                                                                                           | 2022 | China | 1 | 201  | 201 | 7 |
| Liu Z, Li M, Wang Q, Zhao Y, Xu D, Zeng X. The risk factors and prognosis of interstitial lung disease associated with primary sjogren's syndrome: A multi-center cohort study. In; 2018 2018: American College of Rheumatology/Association of Rheumatology Health Professionals Annual Scientific Meeting, ACR/ARHP 2018. United States. 70 (Supplement 9) (pp 1733-1734); John Wiley and Sons Inc.; 2018. | 2018 | China | 4 | 1184 | 184 | 5 |

|                                                                                                                                                                                                                                                                                                                                                                              |      |        |   |     |     |   |
|------------------------------------------------------------------------------------------------------------------------------------------------------------------------------------------------------------------------------------------------------------------------------------------------------------------------------------------------------------------------------|------|--------|---|-----|-----|---|
| <p>Manetti M, Guiducci S, Romano E, Bellando-Randone S, Conforti ML, Ibba-Manneschi L, Matucci-Cerinic M. Increased serum levels and tissue expression of matrix metalloproteinase-12 in patients with systemic sclerosis: correlation with severity of skin and pulmonary fibrosis and vascular damage. <i>Annals of the Rheumatic Diseases</i> 2012; 71(6): 1064-1072.</p> | 2012 | Italy  | 2 | 72  | 34  | 7 |
| <p>Manfredi A, Sebastiani M, Cerri S, Della Casa G, Giuggioli D, Vacchi C, Colaci M, Spinella A, Luppi F, Ferri C. Unclassifiable interstitial lung disease or undifferentiated connective tissue disease? A challenging differential diagnosis. In: 2015 2015: (var.pagings). 74 (SUPPL. 2) (pp 591); BMJ Publishing Group; 2015.</p>                                       | 2015 | Italy  | 7 | 26  | 26  | 6 |
| <p>Manfredi A, Vacchi C, DellaCasa G, Cerri S, Cassone G, Di Cecco G, Luppi F, Salvarani C, Sebastiani M. Fibrosing interstitial lung disease in primary Sjogren syndrome. <i>Joint Bone Spine</i> 2021: 88(6): 105237.</p>                                                                                                                                                  | 2021 | Italy  | 4 | 34  | 34  | 8 |
| <p>Marie I, Hatron PY, Dominique S, Cherin P, Mouthon L, Menard JF. Short-term and long-term outcomes of interstitial lung disease in polymyositis and dermatomyositis: A series of 107 patients. <i>Arthritis Rheum</i> 2011: 63(11): 3439-3447.</p>                                                                                                                        | 2011 | France | 3 | 348 | 107 | 6 |
| <p>Marie I, Josse S, Decaux O, Dominique S, Diot E, Landron C, Roblot P, Jouneau S, Hatron PY, Tiev KP, Vittecoq O, Noel D, Mouthon L, Menard JF, Jouen F. Comparison of long-term outcome between anti-Jo1- and anti-PL7/PL12 positive patients with antisynthetase syndrome. <i>Autoimmunity Reviews</i> 2012: 11(10): 739-745.</p>                                        | 2012 | France | 3 | 95  | 69  | 6 |

|                                                                                                                                                                                                                                                                                                                                                                                                                  |      |             |   |     |     |   |
|------------------------------------------------------------------------------------------------------------------------------------------------------------------------------------------------------------------------------------------------------------------------------------------------------------------------------------------------------------------------------------------------------------------|------|-------------|---|-----|-----|---|
| Markusse IM, Meijs J, de Boer B, Bakker JA, Schippers HPC, Schouffoer AA, Ajmone Marsan N, Kroft LJM, Ninaber MK, Huizinga TWJ, de Vries-Bouwstra JK. Predicting cardiopulmonary involvement in patients with systemic sclerosis: complementary value of nailfold videocapillaroscopy patterns and disease-specific autoantibodies. <i>Rheumatology</i> 2017; 56(7): 1081-1088.                                  | 2017 | Netherlands | 2 | 287 | 147 | 5 |
| Martins Rocha T, Fonseca R, RosaGoncalves D, Aguiar F, Meirinhos T, Bernardes M, Bernardo A, Costa L. Anti-SSA/RO antibodies in a cohort of systemic sclerosis patients: The association with interstitial lung disease. In; 2016 2016: Annual European Congress of Rheumatology of the European League Against Rheumatism, EULAR 2016. United Kingdom. 75 (Supplement 2) (pp 1125); BMJ Publishing Group; 2016. | 2016 | Portugal    | 2 | 108 | 24  | 5 |
| Mei YJ, Wang P, Jiang C, Wang T, Chen LJ, Li ZJ, Pan HF. Clinical and serological associations of anti-ribosomal P0 protein antibodies in systemic lupus erythematosus. <i>Clinical rheumatology</i> 2018; 37(3): 703-707.                                                                                                                                                                                       | 2018 | China       | 6 | 470 | 65  | 4 |
| Mena-Vazquez N, Jimenez-Nunez FG, Godoy-Navarrete FJ, Manrique-Arija S, Aguilar-Hurtado MC, Romero-Barco CM, Urena-Garnica I, Espildora F, Padin-Martin MI, Fernandez-Nebro A. Utility of pulmonary ultrasound to identify interstitial lung disease in patients with rheumatoid arthritis. <i>Clinical rheumatology</i> 2021; 40(6): 2377-2385.                                                                 | 2021 | Spain       | 1 | 71  | 35  | 8 |
| Mena-Vazquez N, Perez Albaladejo L, Manrique-Arija S, Romero Barco CM, Gomez Cano C, Urena Garnica I, Fernandez-Nebro A. Analysis of Clinical-Analytical Characteristics in Patients with Rheumatoid Arthritis and Interstitial Lung Disease: Case-Control Study. <i>Reumatologia Clinica</i> 2019(Journal Article).                                                                                             | 2019 | Spain       | 1 | 82  | 41  | 8 |



|                                                                                                                                                                                                                                                                                                                                                                                                                                                                                                                                     |      |        |         |      |     |   |
|-------------------------------------------------------------------------------------------------------------------------------------------------------------------------------------------------------------------------------------------------------------------------------------------------------------------------------------------------------------------------------------------------------------------------------------------------------------------------------------------------------------------------------------|------|--------|---------|------|-----|---|
| Mena-Vazquez N, Rojas-Gimenez M, Romero-Barco CM, Manrique-Arija S, Hidalgo Conde A, Arnedo Diez de Los Rios R, Cabrera Cesar E, Ortega-Castro R, Espildora F, Aguilar-Hurtado MC, Anon-Onate I, Perez-Albaladejo L, Abarca-Costalago M, Urena-Garnica I, Velloso-Feijoo ML, Redondo-Rodriguez R, Fernandez-Nebro A. Characteristics and Predictors of Progression Interstitial Lung Disease in Rheumatoid Arthritis Compared with Other Autoimmune Disease: A Retrospective Cohort Study. <i>Diagnostics (Basel)</i> 2021: 11(10). | 2021 | Spain  | 1, 2, 3 | 204  | 204 | 8 |
| Meune C, Avouac J, Airao P, Beretta L, Dieude P, Wahbi K, Caramaschi P, Tiev K, Cappelli S, Diot E, Vacca A, Cracowski JL, Sibilia J, Kahan A, MatucciCeric M, Allanore Y. Prediction of pulmonary hypertension related to systemic sclerosis by an index based on simple clinical observations. <i>Arthritis Rheum</i> 2011: 63(9): 2790-2796.                                                                                                                                                                                     | 2011 | France | 2       | 1165 | 401 | 4 |
| Mok MY, Fung PCW, Ooi C, Tse HF, Wong Y, Lam YM, Wong WS, Lau CS. Serum nitric oxide metabolites and disease activity in patients with systemic sclerosis. <i>Clinical rheumatology</i> 2008: 27(3): 315-322.                                                                                                                                                                                                                                                                                                                       | 2008 | China  | 2       | 43   | 37  | 6 |
| Mori S, Koga Y, Sugimoto M. Small airway obstruction in patients with rheumatoid arthritis. <i>Modern Rheumatology</i> 2011: 21(2): 164-173.                                                                                                                                                                                                                                                                                                                                                                                        | 2011 | Japan  | 1       | 189  | 19  | 7 |
| Mori S, Koga Y, Sugimoto M. Different risk factors between interstitial lung disease and airway disease in rheumatoid arthritis. <i>Respiratory medicine</i> 2012: 106(11): 1591-1599.                                                                                                                                                                                                                                                                                                                                              | 2012 | Japan  | 1       | 356  | 24  | 7 |
| Narang NS, Casciola-Rosen L, Li S, Chung L, Fiorentino DF. Cutaneous ulceration in dermatomyositis: association with anti-melanoma differentiation-associated gene 5 antibodies and interstitial lung disease. <i>Arthritis CareRes(Hoboken)</i> 2015: 67(5): 667-672.                                                                                                                                                                                                                                                              | 2015 | USA    | 3       | 152  | 29  | 7 |

|                                                                                                                                                                                                                                                                                                                                                                                                                              |      |       |   |      |     |   |
|------------------------------------------------------------------------------------------------------------------------------------------------------------------------------------------------------------------------------------------------------------------------------------------------------------------------------------------------------------------------------------------------------------------------------|------|-------|---|------|-----|---|
| Narula N, Narula T, Wang B, Abril A. Clinical predictors for development of interstitial lung disease in mixed connective tissue disease. In; 2016 2016: American College of Rheumatology/Association of Rheumatology Health Professionals Annual Scientific Meeting, ACR/ARHP 2016. United States. 68 (Supplement 10) (pp 3854); John Wiley and Sons Inc.; 2016.                                                            | 2016 | USA   | 5 | 28   | 14  | 9 |
| Narvaez J, Borrell H, Sanchez-Alonso F, Rua-Figueroa I, Lopez-Longo FJ, Galindo-Izquierdo M, Calvo-Alen J, Fernandez-Nebro A, Olive A, Andreu JL, Martinez-Taboada V, Nolla JM, Pego-Reigosa JM, Group RS. Primary respiratory disease in patients with systemic lupus erythematosus: data from the Spanish rheumatology society lupus registry (RELESSER) cohort. <i>Arthritis Research &amp; Therapy</i> 2018; 20(1): 280. | 2018 | Spain | 6 | 3215 | 65  | 7 |
| Nicholson TW, Woods A, David J, Hoyles R. Anti-synthetase syndrome: Validity of ana as a screening tool-the oxford ild service experience. In; 2014 2014: (var.pagings). 69 (SUPPL. 2) (pp A193-A194); BMJ Publishing Group; 2014.                                                                                                                                                                                           | 2014 | UK    | 3 | 24   | 24  | 9 |
| Nieto MA, Rodriguez-Nieto MJ, Sanchez-Pernaute O, Romero-Bueno F, Leon L, Vadillo C, Freites-Nunez DD, Jover JA, Alvarez-Sala JL, Abasolo L. Mortality rate in rheumatoid arthritis-related interstitial lung disease: the role of radiographic patterns. <i>BMC pulmonary medicine</i> 2021; 21(1): 205.                                                                                                                    | 2021 | Spain | 1 | 47   | 47  | 8 |
| Nihtyanova SI, Ong VH, Denton CP. Gender-associated differences in disease characteristics and outcome in systemic sclerosis. In; 2012 2012: (var.pagings). 64 (SUPPL. 10) (pp S635); John Wiley and Sons Inc.; 2012.                                                                                                                                                                                                        | 2012 | UK    | 2 | 398  | 207 | 8 |
| Nikiphorou E, Chan E, Saravanan V, Dawson J, Sathi N, Woodhead F, Nisar M, Arthanari S, Ahmad Y, Young A, Kelly C. Serological biomarkers for the development of rheumatoid arthritis related interstitial lung disease. In; 2013 2013: (var.pagings). 65 (SUPPL. 10) (pp S182); John Wiley and Sons Inc.; 2013.                                                                                                             | 2013 | UK    | 1 | 230  | 230 | 6 |

|                                                                                                                                                                                                                                                                           |      |           |      |     |    |   |
|---------------------------------------------------------------------------------------------------------------------------------------------------------------------------------------------------------------------------------------------------------------------------|------|-----------|------|-----|----|---|
| Nokes BT, Raza HA, Cartin-Ceba R, Lyng PJ, Krahn LE, Wesselius L, Jokerst CE, Umar SB, Griffing WL, Neville MR, Malhotra A, Parish JM. Individuals With Scleroderma May Have Increased Risk of Sleep-Disordered Breathing. <i>JClinSleep Med</i> 2019; 15(11): 1665-1669. | 2019 | USA       | 2    | 171 | 63 | 7 |
| Nunez A, Ojanguren I, Munoz X, Cruz MJ, Morell F, Villar A. Radiologic pattern as a survival predictor in the rheumatoid arthritis interstitial lung disease. In; 2015 2015: (var.pagings). 46 (SUPPL. 59) (no pagination); European Respiratory Society; 2015.           | 2015 | Spain     | 1    | 21  | 21 | 7 |
| Obert J, Freynet O, Nunes H, Brillet P-Y, Miyara M, Dhote R, Valeyre D, Naccache J-M. Outcome and prognostic factors in a French cohort of patients with myositis-associated interstitial lung disease. <i>RheumatolInt</i> 2016; 36(12): 1727-1735.                      | 2016 | France    | 3    | 48  | 48 | 8 |
| Okada H, Kurasawa K, Yamazaki R, Tanaka A, Arai S, Owada T, Maezawa R, Ishii Y. Clinical features of organizing pneumonia associated with rheumatoid arthritis. <i>Modern Rheumatology</i> 2016; 26(6): 863-868.                                                          | 2016 | Japan     | 1    | 499 | 84 | 7 |
| Oliveira RP, Ribeiro R, Melo L, Grima B, Oliveira S, Alves JD. Connective tissue disease-associated interstitial lung disease. <i>Pulmonology</i> 2022; 28(2): 113-118.                                                                                                   | 2020 | Portugal  | 1, 2 | 53  | 53 | 8 |
| Ong SG, Ding HJ, Zuhani AH, Aida AA, Norazizah IW. Predictors and radiological characteristics of rheumatoid arthritis-associated interstitial lung disease in a multi-ethnic Malaysian cohort. <i>Med J Malaysia</i> 2022; 77(3): 292-299.                               | 2022 | Malaysia  | 1    | 732 | 54 | 8 |
| Ooi GC, Mok MY, Tsang KW, Wong Y, Khong PL, Fung PC, Chan S, Tse HF, Wong RW, Lam WK, Lau CS. Interstitial lung disease in systemic sclerosis. <i>Acta Radiol</i> 2003; 44(3): 258-264.                                                                                   | 2003 | Hong Kong | 2    | 45  | 39 | 6 |

|                                                                                                                                                                                                                                                                                                                                            |      |           |   |     |     |   |
|--------------------------------------------------------------------------------------------------------------------------------------------------------------------------------------------------------------------------------------------------------------------------------------------------------------------------------------------|------|-----------|---|-----|-----|---|
| Palm O, Ueland T, Garen T, Michelsen AE, Reisetser S, Aukrust P, Aalokken TM, Molberg O. Endostatin is higher and associated with pulmonary involvement in primary Sjogren's syndrome. <i>ClinExpRheumatol</i> 2016: 34(4): 690-693.                                                                                                       | 2016 | Norway    | 4 | 144 | 36  | 7 |
| Palmer E, Kelly C, Nisar M, Arthanari S, Woodhead F, PriceForbes A, Middleton D, Dempsey O, Dawson J, Sathi N, Ahmad Y, Koduri G, Young A. Rheumatoid-arthritis-related interstitial lung disease: Association between biologic therapy and survival. In; 2014 2014: (var.pagings). 53 (SUPPL. 1) (pp i44); Oxford University Press; 2014. | 2014 | UK        | 1 | 376 | 188 | 8 |
| Parida P, Sahoo A, Tripathy R, Das B. Extra-articular manifestations in rheumatoid arthritis and its association with rheumatoid factor and anti-CCP. In; 2011 2011: (var.pagings). 6 (3 SUPPL. 1) (pp S9); Elsevier (Singapore) Pte Ltd; 2011.                                                                                            | 2011 | India     | 1 | 152 | 12  | 7 |
| Park JK, George M, Danoff SK, Qubti MA, Gelber AC, ChristopherStine L. ESR and CRP do not correlate with extent of muscle injury but their elevation is associated with pulmonary involvement in Idiopathic Inflammatory myopathy. In; 2010 2010: (var.pagings). 62 (SUPPL. 10) (pp 919); John Wiley and Sons Inc.; 2010.                  | 2010 | USA       | 3 | 48  | 21  | 8 |
| Paulin F, Doyle TJ, Mercado JF, Fassola L, Fernandez M, Caro F, Alberti ML, Espindola MEC, Buschiazio E. Development of a Risk Indicator Score for the Identification of Interstitial Lung Disease in Patients With Rheumatoid Arthritis. <i>Reumatologia Clinica</i> 2019(Journal Article).                                               | 2019 | Argentina | 1 | 118 | 52  | 8 |
| Paulin F, Mercado JF, Fernandez ME, Caro FM, Alberti ML, Fassola LA. Correlation between Lung and Joint Involvement in Patients with Rheumatoid Arthritis and Interstitial Lung Disease: A Cross-Sectional Study. <i>RevInvestClin</i> 2018: 70(2): 76-81.                                                                                 | 2018 | Argentina | 1 | 46  | 46  | 7 |

|                                                                                                                                                                                                                                                                                                                                    |      |          |   |     |     |   |
|------------------------------------------------------------------------------------------------------------------------------------------------------------------------------------------------------------------------------------------------------------------------------------------------------------------------------------|------|----------|---|-----|-----|---|
| Peng QL, Zhang YM, Liang L, Liu X, Ye LF, Yang HB, Zhang L, Shu XM, Lu X, Wang GC. A high level of serum neopterin is associated with rapidly progressive interstitial lung disease and reduced survival in dermatomyositis. <i>ClinExpImmunol</i> 2020; 199(3): 314-325.                                                          | 2020 | China    | 3 | 182 | 124 | 8 |
| Perez-Dorame R, Mejia M, Mateos-Toledo H, Rojas-Serrano J. Rheumatoid arthritis-associated interstitial lung disease: lung inflammation evaluated with high resolution computed tomography scan is correlated to rheumatoid arthritis disease activity. <i>Reumatologia Clinica</i> 2015; 11(1): 12-16.                            | 2015 | Mexico   | 1 | 34  | 34  | 8 |
| Pernot J, Puzenat E, Magy-Bertrand N, Manzoni P, Gondouin A, Bourdin H, Simon-Rigaud M-L, Regnard J, Degano B. Detection of interstitial lung disease in systemic sclerosis through partitioning of lung transfer for carbon monoxide. <i>Respiration</i> 2012; 84(6): 461-468.                                                    | 2012 | France   | 2 | 35  | 13  | 8 |
| Pinal-Fernandez I, Mecoli CA, Casal-Dominguez M, Pak K, Hosono Y, Huapaya J, Huang W, Albayda J, Tiniakou E, Paik JJ, Johnson C, Danoff SK, Corse AM, Christopher-Stine L, Mammen AL. More prominent muscle involvement in patients with dermatomyositis with anti-Mi2 autoantibodies. <i>Neurology</i> 2019; 93(19): e1768-e1777. | 2019 | USA      | 3 | 533 | 91  | 7 |
| Ponte CB, Morais F, CampanilhoMarques R, Resende C, Pereira Da Silva J. High-resolution computed tomographic findings in patients with systemic sclerosis and their clinical correlations. In; 2013 2013: (var.pagings). 72 (SUPPL. 3) (no pagination); BMJ Publishing Group; 2013.                                                | 2013 | Portugal | 2 | 45  | 29  | 7 |
| Poormoghim H, Andalib E, Jalali A, Ghaderi A, Ghorbannia A, Mojtabavi N. Survival and causes of death in systemic sclerosis patients: a single center registry report from Iran. <i>RheumatolInt</i> 2016; 36(7): 925-934.                                                                                                         | 2016 | Iran     | 2 | 220 | 134 | 8 |

|                                                                                                                                                                                                                                                                                                                                                                                                                                                                                                                                                                                                                                                                                                                                                                                                                                                                    |      |                 |   |       |      |   |
|--------------------------------------------------------------------------------------------------------------------------------------------------------------------------------------------------------------------------------------------------------------------------------------------------------------------------------------------------------------------------------------------------------------------------------------------------------------------------------------------------------------------------------------------------------------------------------------------------------------------------------------------------------------------------------------------------------------------------------------------------------------------------------------------------------------------------------------------------------------------|------|-----------------|---|-------|------|---|
| <p>Proudman S. What have registries around the world taught us about systemic sclerosis? In; 2018 2018: 20th Asia Pacific League of Associations for Rheumatology Congress, APLAR 2018. Taiwan (Republic of China). 21 (Supplement 1) (pp 17-18); Blackwell Publishing; 2018.</p>                                                                                                                                                                                                                                                                                                                                                                                                                                                                                                                                                                                  | 2018 | Australia       | 2 | 17838 | 4639 | 8 |
| <p>Qaradakhly TA, Ali KM, Karim OH. Prevalence of interstitial lung disease among patients with systemic sclerosis in Iraqi Kurdistan. In; 2012 2012: (var.pagings). 14 (SUPPL. 1) (no pagination); BioMed Central Ltd.; 2012.</p>                                                                                                                                                                                                                                                                                                                                                                                                                                                                                                                                                                                                                                 | 2012 | Iraqi Kurdistan | 2 | 30    | 16   | 8 |
| <p>Qian J, He C, Peng L, Xu D, Fei Y, Zhang W, Zhao Y, Dong Y, Li Y, Zhang X, Chen H, Yang Y, Chen Z, Liu S, Wang L, Zhang F. Ten-year survival analysis of patients with primary Sjogren's syndrome in China: a national prospective cohort study. <i>Ther Adv Musculoskelet Dis</i> 2021; 13((Qian, He, Li, Peng, Yang, Xu, Fei, Zhang, Zhao, Dong, Zhang, Chen, Yang, Chen, Liu, Wang, Zhang) Department of Rheumatology and Clinical Immunology, Chinese Academy of Medical Sciences Peking Union Medical College, National Clinical Research Center for Dermatologic and Immunologic Diseases (NCRC-DID), Ministry of Science Technology, State Key Laboratory of Complex Severe and Rare Diseases, Peking Union Medical College Hospital (PUMCH), Key Laboratory of Rheumatology and Clinical Immunology, Ministry of Education, Beijing 100730, China).</p> | 2021 | China           | 4 | 834   | 71   | 7 |
| <p>Reiseter S, Ungprasert P, Gunnarsson R, Molberg O, Lund MB, Aalokken TM, Szodoray P, Bodolay E. The development and validation of interstitial lung disease prediction models in three international mixed connective tissue disease cohorts: the Norwegian MCTD cohort, the Hungarian MCTD cohort and the MCTD cohort from Minnesota, US. In; 2018 2018: Annual European Congress of Rheumatology, EULAR 2018. Netherlands. 77 (Supplement 2) (pp 1188); BMJ Publishing Group; 2018.</p>                                                                                                                                                                                                                                                                                                                                                                       | 2018 | Norway          | 5 | 365   | 182  | 7 |

|                                                                                                                                                                                                                                                                                                                                                                                                                                                          |      |        |   |     |    |   |
|----------------------------------------------------------------------------------------------------------------------------------------------------------------------------------------------------------------------------------------------------------------------------------------------------------------------------------------------------------------------------------------------------------------------------------------------------------|------|--------|---|-----|----|---|
| Richman NC, Yazdany J, Graf J, Chernitskiy V, Imboden JB. Extraarticular manifestations of rheumatoid arthritis in a multiethnic cohort of predominantly Hispanic and Asian patients. <i>Medicine (Baltimore)</i> 2013; 92(2): 92-97.                                                                                                                                                                                                                    | 2013 | USA    | 1 | 274 | 10 | 7 |
| Rimar D, Rosner I, Slobodin G, Rozenbaum M, Halasz K, Haj T, Jiries N, Kaly L, Boulman N, Daood R, Vadas Z. Semaphorin 3A as a possible immunoregulator in systemic sclerosis. In; 2014 2014: (var.pagings). 32 (2 SUPPL. 81) (pp S66); <i>Clinical and Experimental Rheumatology S.A.S.</i> ; 2014.                                                                                                                                                     | 2014 | Israel | 2 | 27  | 10 | 8 |
| Rocha-Munoz AD, Ponce-Guarneros M, Gamez-Nava JI, Olivas-Flores EM, Mejia M, Juarez-Contreras P, Martinez-Garcia EA, Corona-Sanchez EG, Rodriguez-Hernandez TM, Vazquez-del Mercado M, Salazar-Paramo M, Nava-Zavala AH, Cardona-Munoz EG, Celis A, Gonzalez-Lopez L. Anti-Cyclic Citrullinated Peptide Antibodies and Severity of Interstitial Lung Disease in Women with Rheumatoid Arthritis. <i>Jimmunolres</i> 2015: 2015(Journal Article): 151626. | 2015 | Mexico | 1 | 600 | 39 | 8 |
| RodriguezGarcia SC, CastellanosMoreira RA, HernandezMiguel MV, Ramirez J, Cuervo A, Canete J, SanmartiSala R. Clinical features and evolution of pulmonary function in a single-center cohort of patients with rheumatoid arthritis related interstitial lung disease. In; 2017 2017: Annual European Congress of Rheumatology, EULAR 2017. Spain. 76 (Supplement 2) (pp 817); <i>BMJ Publishing Group</i> ; 2017.                                       | 2017 | Spain  | 1 | 21  | 21 | 7 |
| Salaffi F, Carotti M, Di Carlo M, Tardella M, Giovagnoni A. High-resolution computed tomography of the lung in patients with rheumatoid arthritis: Prevalence of interstitial lung disease involvement and determinants of abnormalities. <i>Medicine (Baltimore)</i> 2019; 98(38): e17088.                                                                                                                                                              | 2019 | Italy  | 1 | 151 | 29 | 8 |

|                                                                                                                                                                                                                                                                                                                 |      |         |   |      |     |   |
|-----------------------------------------------------------------------------------------------------------------------------------------------------------------------------------------------------------------------------------------------------------------------------------------------------------------|------|---------|---|------|-----|---|
| Salaffi F, Di Carlo M, Carotti M, Fraticelli P, Gabrielli A, Giovagnoni A. Relationship between interstitial lung disease and oesophageal dilatation on chest high-resolution computed tomography in patients with systemic sclerosis: a cross-sectional study. <i>RadiolMed(Torino)</i> 2018; 123(9): 655-663. | 2018 | Italy   | 2 | 126  | 86  | 8 |
| Sanchez Cano D, Callejas Rubio JL, Rios Fernandez R, Ortego Centeno N, Fonollosa V, Tolosa C, Rodriguez Carballeira M, Simeon CP. The spanish scleroderma study group: Focusing on interstitial lung disease. In; 2015 2015: (var.pagings). 74 (SUPPL. 2) (pp 823); BMJ Publishing Group; 2015.                 | 2015 | Spain   | 2 | 1374 | 595 | 7 |
| Sargin G, Kose R, Senturk T. Tumor-associated antigens in rheumatoid arthritis interstitial lung disease or malignancy? <i>Archives of Rheumatology</i> 2018; 33(4): 431-437.                                                                                                                                   | 2018 | Turkey  | 1 | 83   | 43  | 7 |
| Sari A, Guven D, Armagan B, Erden A, Kalyoncu U, Karadag O, Apras Bilgen S, Ertenli I, Kiraz S, Akdogan A. Rituximab Experience in Patients With Long-standing Systemic Sclerosis-Associated Interstitial Lung Disease: A Series of 14 Patients. <i>Jclinrheumatol</i> 2017; 23(8): 411-415.                    | 2017 | Turkey  | 2 | 197  | 117 | 8 |
| Savarino E, Bazzica M, Zentilin P, Pohl D, Parodi A, Cittadini G, Negrini S, Indiveri F, Tutuian R, Savarino V, Ghio M. Gastroesophageal reflux and pulmonary fibrosis in scleroderma: a study using pH-impedance monitoring. <i>AmJRespirCritCare Med</i> 2009; 179(5): 408-413.                               | 2009 | Italy   | 2 | 40   | 18  | 8 |
| Schnabel A, Reuter M, Biederer J, Richter C, Gross WL. Interstitial lung disease in polymyositis and dermatomyositis: clinical course and response to treatment. <i>SeminArthritis Rheum</i> 2003; 32(5): 273-284.                                                                                              | 2003 | Germany | 3 | 63   | 20  | 8 |
| Sebastian A, MisterskaSkora M, Silicki J, Sebastian M, Wiland P. Chest HRCT findings in patients with primary Sjogren's syndrome. <i>Advances in Clinical and Experimental Medicine</i> 2017; 26(7): 1101-1106.                                                                                                 | 2017 | Poland  | 4 | 68   | 13  | 8 |



|                                                                                                                                                                                                                                                                                                                                                                                                                                                   |      |          |   |     |     |   |
|---------------------------------------------------------------------------------------------------------------------------------------------------------------------------------------------------------------------------------------------------------------------------------------------------------------------------------------------------------------------------------------------------------------------------------------------------|------|----------|---|-----|-----|---|
| <p>Sebastiani M, Manfredi A, Tonelli R, Spagnolo P, Campomori F, Vacchi C, Cocconcilli E, Cerri S, Colaci M, Luppi F, Della Casa G, Sverzellati N, Torricelli P, Richeldi L, Ferri C. Rheumatoid arthritis related interstitial lung disease. Radiological patterns and correlations with clinical, serological and demographic features of disease. In; 2014 2014: (var.pagings). 73 (SUPPL. 2) (no pagination); BMJ Publishing Group; 2014.</p> | 2014 | Italy    | 1 | 99  | 32  | 5 |
| <p>Sharma L, Raval D, Bindro M, Ekbote G, Negalur N, Tanna D, Kazi W, Rao D, Bajaj R, Gupta R. Prevalence of ILD in lupus and its serological and systemic association: A cross sectional study at a tertiary care centre in India. In; 2018 2018: Annual Conference of Indian Rheumatology Association, IRACON 2018. India. 13 (6 Supplement 1) (pp S225); Wolters Kluwer Medknow Publications; 2018.</p>                                        | 2018 | India    | 6 | 289 | 23  | 7 |
| <p>Siddiqui S, Coath F, Bharadwaj A, Borg F, Koduri G. Monitoring of interstitial lung disease in rheumatoid patients in routine clinical practice and therapies. In; 2018 2018: 2018 Annual Conference of the British Society for Rheumatology. United Kingdom. 57 (Supplement 3) (pp iii147); Oxford University Press; 2018.</p>                                                                                                                | 2018 | UK       | 1 | 22  | 22  | 7 |
| <p>Sogkas G, Hirsch S, Olsson KM, Hinrichs JB, Thiele T, Seeliger T, Skripuletz T, Schmidt RE, Witte T, Jablonka A, Ernst D. Lung Involvement in Primary Sjogren's Syndrome-An Under-Diagnosed Entity. <i>Frontiers in medicine</i> 2020: 7(101648047): 332.</p>                                                                                                                                                                                  | 2020 | Germany  | 4 | 268 | 31  | 9 |
| <p>Sousa SI, Duarte A, Cordeiro I, Teixeira L, Canas Da Silva J, Cordeiro A, Santos MJ. Interstitial lung disease in scleroderma portuguese patients. In; 2016 2016: Annual European Congress of Rheumatology of the European League Against Rheumatism, EULAR 2016. United Kingdom. 75 (Supplement 2) (pp 1122); BMJ Publishing Group; 2016.</p>                                                                                                 | 2016 | Portugal | 2 | 103 | 34  | 6 |
| <p>Steelandt A, Benmostefa N, Avouac J, Mouthon L, Allanore Y. Ethnic influence on the phenotype of French patients with systemic sclerosis. <i>Joint Bone Spine</i> 2021: 88(2): 105081.</p>                                                                                                                                                                                                                                                     | 2021 | France   | 2 | 425 | 199 | 8 |

|                                                                                                                                                                                                                                                                                                                                                      |      |             |                  |     |     |   |
|------------------------------------------------------------------------------------------------------------------------------------------------------------------------------------------------------------------------------------------------------------------------------------------------------------------------------------------------------|------|-------------|------------------|-----|-----|---|
| Tanaka A, Tsukamoto H, Mitoma H, Kiyohara C, Ueda N, Ayano M, Ohta S-i, Kimoto Y, Akahoshi M, Arinobu Y, Niuro H, Tada Y, Horiuchi T, Akashi K. Serum progranulin levels are elevated in dermatomyositis patients with acute interstitial lung disease, predicting prognosis. <i>Arthritis Research &amp; Therapy</i> 2015: 17(Journal Article): 27. | 2015 | Japan       | 3                | 78  | 41  | 8 |
| Tanaka N, Kim JS, Newell JD, Brown KK, Cool CD, Meehan R, Emoto T, Matsumoto T, Lynch DA. Rheumatoid arthritis-related lung diseases: CT findings. <i>Radiology</i> 2004: 232(1): 81-91.                                                                                                                                                             | 2004 | Japan, USA  | 1                | 63  | 63  | 8 |
| Tanaka N, Kunihiro Y, Kubo M, Kawano R, Oishi K, Ueda K, Gondo T. HRCT findings of collagen vascular disease-related interstitial pneumonia (CVD-IP): a comparative study among individual underlying diseases. <i>ClinRadiol</i> 2018: 73(9): 833.e831-833.e810.                                                                                    | 2018 | Japan       | 1, 2, 3, 4, 5, 6 | 187 | 187 | 7 |
| Taouli B, Brauner MW, Mourey I, Lemouchi D, Grenier PA. Thin-section chest CT findings of primary Sjogren's syndrome: Correlation with pulmonary function. <i>EurRadiol</i> 2002: 12(6): 1504-1511.                                                                                                                                                  | 2002 | France      | 4                | 35  | 12  | 8 |
| ter Borg EJ, Kelder JC. Development of new extra-glandular manifestations or associated auto-immune diseases after establishing the diagnosis of primary Sjogren's syndrome: A long-term study of the Antonius Nieuwegein Sjogren (ANS) cohort. <i>RheumatolInt</i> 2017: 37(7): 1153-1158.                                                          | 2017 | Netherlands | 4                | 140 | 17  | 7 |
| Tezcan D, Sivrikaya A, Ergun D, Ozer H, Eryavuz Onmaz D, Korez MK, Akdag T, Gulcernal S, Limon M, Yilmaz S. Evaluation of serum interleukin-6 (IL-6), IL-13, and IL-17 levels and computed tomography finding in interstitial lung disease associated with connective tissue disease patients. <i>Clinical Rheumatology</i> 2021: 40(11): 4713-4724. | 2021 | Turkey      | 1, 2, 4          | 80  | 80  | 8 |

|                                                                                                                                                                                                                                                                                                                                                     |      |                |   |     |    |   |
|-----------------------------------------------------------------------------------------------------------------------------------------------------------------------------------------------------------------------------------------------------------------------------------------------------------------------------------------------------|------|----------------|---|-----|----|---|
| Tezcan D, Turan C, Yilmaz S, Sivrikaya A, Gulcemal S, Limon M, Ecer B. What do simple hematological parameters tell us in patients with systemic sclerosis? <i>Acta dermatovenerolog Alp Pannon Adriat</i> 2020; 29(3): 101-107.                                                                                                                    | 2020 | Turkey         | 2 | 129 | 63 | 7 |
| Tiev KP, Hua-Huy T, Kettaneh A, Allanore Y, Le-Dong N-N, Duong-Quy S, Cabane J, Dinh-Xuan AT. Alveolar concentration of nitric oxide predicts pulmonary function deterioration in scleroderma. <i>Thorax</i> 2012; 67(2): 157-163.                                                                                                                  | 2012 | France         | 2 | 105 | 51 | 8 |
| Tomita M, Kadono T, Yazawa N, Kawashima T, Tamaki Z, Ashida R, Ohmatsu H, Asano Y, Sugaya M, Kubo M, Ihn H, Tamaki K, Sato S. Serum levels of soluble CD21 in patients with systemic sclerosis. <i>RheumatolInt</i> 2012; 32(2): 317-321.                                                                                                           | 2012 | Japan          | 2 | 53  | 24 | 6 |
| Tomiyama F, Watanabe R, Ishii T, Kamogawa Y, Fujita Y, Shiota Y, Sugimura K, Fujii H, Harigae H. High Prevalence of Acute Exacerbation of Interstitial Lung Disease in Japanese Patients with Systemic Sclerosis. <i>Tohoku JExpMed</i> 2016; 239(4): 297-305.                                                                                      | 2016 | Japan          | 2 | 139 | 66 | 8 |
| Trombetta AC, Smith V, Gotelli E, Ghio M, Paolino S, Pizzorni C, Vanhaecke A, Ruaro B, Patane M, Sulli A, Cutolo M. Vitamin d deficiency correlates with advanced organ involvement in european systemic sclerosis patients. In; 2018 2018: 5th Systemic Sclerosis World Congress. France. 3 (Supplement 1) (pp 224); SAGE Publications Inc.; 2018. | 2018 | Italy, Belgium | 2 | 154 | 71 | 8 |
| Tufvesson E, Bozovic G, Hesselstrand R, Bjermer L, Scheja A, Wuttge DM. Increased cysteinyl-leukotrienes and 8-isoprostane in exhaled breath condensate from systemic sclerosis patients. <i>Rheumatology</i> 2010; 49(12): 2322-2326.                                                                                                              | 2010 | Sweden         | 2 | 22  | 12 | 6 |

|                                                                                                                                                                                                                                                                                                                                                                                                                                                                                                                                                                                                                                                             |      |         |   |     |     |   |
|-------------------------------------------------------------------------------------------------------------------------------------------------------------------------------------------------------------------------------------------------------------------------------------------------------------------------------------------------------------------------------------------------------------------------------------------------------------------------------------------------------------------------------------------------------------------------------------------------------------------------------------------------------------|------|---------|---|-----|-----|---|
| <p>Uh ST, Lee BY, Koo SM, Kim YK, Kim KU, Kim DJ. Change of primary Sjoren's syndrome-associated interstitial lung disease in computerized tomogram of chest during two years. In; 2018 2018: European Respiratory Society International Congress, ERS 2018. France. 52 (Supplement 62) (no pagination); European Respiratory Society; 2018.</p>                                                                                                                                                                                                                                                                                                            | 2018 | Korea   | 4 | 22  | 22  | 8 |
| <p>Ungprasert P, Wilton KM, Ernste FC, Kalra S, Crowson CS, Rajagopalan S, Bartholmai BJ. Novel Assessment of Interstitial Lung Disease Using the "Computer-Aided Lung Informatics for Pathology Evaluation and Rating" (CALIPER) Software System in Idiopathic Inflammatory Myopathies. <i>Lung</i> 2017; 195(5): 545-552.</p>                                                                                                                                                                                                                                                                                                                             | 2017 | USA     | 3 | 110 | 110 | 7 |
| <p>van Bon L, Affandi AJ, Broen J, Christmann RB, Marijnissen RJ, Stawski L, Farina GA, Stifano G, Mathes AL, Cossu M, York M, Collins C, Wenink M, Huijbens R, Hesselstrand R, Saxne T, DiMarzio M, Wuttge D, Agarwal SK, Reveille JD, Assassi S, Mayes M, Deng Y, Drenth JPH, de Graaf J, den Heijer M, Kallenberg CGM, Biji M, Loof A, van den Berg WB, Joosten LAB, Smith V, de Keyser F, Scorza R, Lunardi C, van Riel PLCM, Vonk M, van Heerde W, Meller S, Homey B, Beretta L, Roest M, Trojanowska M, Lafyatis R, Radstake TRDJ. Proteome-wide analysis and CXCL4 as a biomarker in systemic sclerosis. <i>NEnglJMed</i> 2014; 370(5): 433-443.</p> | 2014 | USA     | 2 | 779 | 272 | 7 |
| <p>Vandecasteele E, Melsens K, Vanhaecke A, Blockmans D, Bonroy C, Carton C, Deschepper E, De Keyser F, Houssiau F, Piette Y, Vanthuyne M, Verbeke K, Westhovens R, Wuyts WA, De Langhe E, Brusselle G, Smith V. Incidence, prevalence and long-term progression of Goh algorithm rated interstitial lung disease in systemic sclerosis in two independent cohorts in flanders: A retrospective cohort study. <i>Semin Arthritis Rheum</i> 2021; 51(5): 969-976.</p>                                                                                                                                                                                        | 2021 | Belgium | 2 | 722 | 282 | 7 |

|                                                                                                                                                                                                                                                                                                                                                                                           |      |             |         |     |    |   |
|-------------------------------------------------------------------------------------------------------------------------------------------------------------------------------------------------------------------------------------------------------------------------------------------------------------------------------------------------------------------------------------------|------|-------------|---------|-----|----|---|
| Vojinovic T, Cavazzana I, Ceruti P, Fredi M, Modena D, Berlendis M, Franceschini F. Predictive Features and Clinical Presentation of Interstitial Lung Disease in Inflammatory Myositis. <i>Clin Rev Allergy Immunol</i> 2021: 60(1): 87-94.                                                                                                                                              | 2020 | Italy       | 3       | 138 | 45 | 8 |
| Voortman M, Ter Borg E, Kruize AA, Radstake TR, Zanen P, De Jong PA, Van Den Heuvel D, Grutters JC. Interstitial lung disease in patients with primary Sjogren's syndrome: Correlation of radiology, pathology, and clinical phenotype. In; 2017 2017: American Thoracic Society International Conference, ATS 2017. United States. 195 (no pagination); American Thoracic Society; 2017. | 2017 | Netherlands | 4       | 39  | 38 | 6 |
| Wang J, Wang X, Qi X, Sun Z, Zhang T, Cui Y, Shu Q. The Efficacy and Safety of Pirfenidone Combined With Immunosuppressant Therapy in Connective Tissue Disease-Associated Interstitial Lung Disease: A 24-Week Prospective Controlled Cohort Study. <i>Frontiers in medicine</i> 2022: 9(101648047): 871861.                                                                             | 2022 | China       | 1, 2, 3 | 98  | 98 | 6 |
| Wang J-X, Du C-G. A retrospective study of clinical characteristics of interstitial lung disease associated with rheumatoid arthritis in Chinese patients. <i>MedSciMonit</i> 2015: 21(Journal Article): 708-715.                                                                                                                                                                         | 2015 | China       | 1       | 544 | 83 | 8 |
| Wang N, Zhang Q, Jing X, Guo J, Huang H, Xu Z. The Association Between MUC5B Mutations and Clinical Outcome in Patients with Rheumatoid Arthritis-Associated Interstitial Lung Disease: A Retrospective Exploratory Study in China. <i>MedSciMonit</i> 2020: 26(Journal Article): e920137.                                                                                                | 2020 | China       | 1       | 96  | 45 | 8 |
| Wang T, Zheng X-J, Liang B-M, Liang Z-A. Clinical features of rheumatoid arthritis-associated interstitial lung disease. <i>Scientific Reports</i> 2015: 5(Journal Article): 14897.                                                                                                                                                                                                       | 2016 | China       | 1       | 111 | 28 | 8 |

|                                                                                                                                                                                                                                                                                                                   |      |          |   |     |    |   |
|-------------------------------------------------------------------------------------------------------------------------------------------------------------------------------------------------------------------------------------------------------------------------------------------------------------------|------|----------|---|-----|----|---|
| Wang Y, Chen S, Lin J, Xie X, Hu S, Lin Q, Zheng K, Du G, Huang X, Zhang G, Gargani L, Matucci-Cerinic M, Furst DE. Lung ultrasound B-lines and serum KL-6 correlate with the severity of idiopathic inflammatory myositis-associated interstitial lung disease. <i>Rheumatology</i> 2019(Journal Article).       | 2019 | China    | 3 | 38  | 38 | 8 |
| Wangkaew S, Euathrongchit J, Wattanawittawas P, Kasitanon N, Louthrenoo W. Incidence and predictors of interstitial lung disease (ILD) in Thai patients with early systemic sclerosis: Inception cohort study. <i>Modern Rheumatology</i> 2016; 26(4): 588-593.                                                   | 2016 | Thailand | 2 | 113 | 81 | 7 |
| Watanabe E, Gono T, Kuwana M, Terai C. Predictive factors for sustained remission with stratification by myositis-specific autoantibodies in adult polymyositis/dermatomyositis. <i>Rheumatology (United Kingdom)</i> 2020; 59(3): 586-593.                                                                       | 2020 | Japan    | 3 | 168 | 88 | 8 |
| Woo JH, Kim YJ, Kim JJ, Choi CB, Sung YK, Kim TH, Jun JB, Bae SC, Yoo DH. Mortality factors in idiopathic inflammatory myopathy: Focusing on malignancy and interstitial lung disease. <i>Modern Rheumatology</i> 2013; 23(3): 503-508.                                                                           | 2013 | Korea    | 3 | 162 | 83 | 8 |
| Wu X, Xu L, Cheng Q, Nie L, Zhang S, Du Y, Xue J. Increased serum soluble programmed death ligand 1(sPD-L1) is associated with the presence of interstitial lung disease in rheumatoid arthritis: A monocentric cross-sectional study. <i>Respiratory medicine</i> 2020; 166(Journal Article): 105948.            | 2020 | China    | 1 | 87  | 58 | 6 |
| Wuttge DM, Andreasson A, Tufvesson E, Johansson ACM, Scheja A, Hellmark T, Hesselstrand R, Truedsson L. CD81 and CD48 show different expression on blood eosinophils in systemic sclerosis: new markers for disease and pulmonary inflammation? <i>Scandinavian journal of rheumatology</i> 2016; 45(2): 107-113. | 2016 | Sweden   | 2 | 32  | 14 | 7 |

|                                                                                                                                                                                                                                                                                                                                                                            |      |        |      |     |    |   |
|----------------------------------------------------------------------------------------------------------------------------------------------------------------------------------------------------------------------------------------------------------------------------------------------------------------------------------------------------------------------------|------|--------|------|-----|----|---|
| Yalcinkaya Y, Cinar S, Artim-Esen B, Kamali S, Ocal L, Deniz G, Inanc M. The relationship between vascular biomarkers and disease characteristics in systemic sclerosis: elevated MCP-1 is predominantly associated with fibrotic manifestations. <i>ClinExpRheumatol</i> 2016: 34(Suppl 100(5): 110-114.                                                                  | 2016 | Turkey | 2    | 72  | 18 | 8 |
| Yamakawa H, Hagiwara E, Kitamura H, Yamanaka Y, Ikeda S, Sekine A, Baba T, Okudela K, Iwasawa T, Takemura T, Kuwano K, Ogura T. Serum KL-6 and surfactant protein-D as monitoring and predictive markers of interstitial lung disease in patients with systemic sclerosis and mixed connective tissue disease. <i>Jthoracdis</i> 2017: 9(2): 362-371.                      | 2017 | Japan  | 2, 5 | 40  | 40 | 8 |
| Yanaba K, Yoshizaki A, Muroi E, Ogawa F, Shimizu K, Sato S. Increased circulating soluble vascular adhesion protein-1 levels in systemic sclerosis: association with lower frequency and severity of interstitial lung disease. <i>International Journal of Rheumatic Diseases</i> 2013: 16(4): 442-447.                                                                   | 2013 | Japan  | 2    | 71  | 36 | 6 |
| Yang JA, Lee JS, Park JK, Lee EB, Song YW, Lee EY. Clinical characteristics associated with occurrence and poor prognosis of interstitial lung disease in rheumatoid arthritis. <i>Korean JInternMed</i> 2019: 34(2): 434-441.                                                                                                                                             | 2019 | Korea  | 1    | 308 | 77 | 7 |
| Yang Y, Yin G, Hao J, Xie Q, Liu Y. Serum Interleukin-18 Level is Associated With Disease Activity and Interstitial Lung Disease in Patients With Dermatomyositis. <i>Archives of Rheumatology</i> 2017: 32(3): 181-188.                                                                                                                                                   | 2017 | China  | 3    | 49  | 24 | 6 |
| Yathish GC, Samant R, Mahashur A, Parikh T, Sagdeo P, Kakade G. Predictors of ILD and its progression in a cohort of Scleroderma patients from western India: A prospective observational cohort study. In: 2016 2016: 32nd Annual National Conference of the Indian Rheumatology Association, IRACON 2016. India. 11 (5 Supplement) (pp S71); Medknow Publications; 2016. | 2016 | India  | 2    | 68  | 53 | 6 |

|                                                                                                                                                                                                                                                                                                                                                                                                                                |      |             |   |     |     |   |
|--------------------------------------------------------------------------------------------------------------------------------------------------------------------------------------------------------------------------------------------------------------------------------------------------------------------------------------------------------------------------------------------------------------------------------|------|-------------|---|-----|-----|---|
| Yayla ME, Balci G, Torgutalp M, Eroglu DS, Dincer ABK, Guloksuz EGA, Sezer S, Yuksel ML, Ates A, Turgay TM, Kinikli G. Interstitial Lung Disease in Systemic Sclerosis: A Single-center Retrospective Analysis. <i>Curr Rheumatol Rev</i> 2022; 18(2): 150-156.                                                                                                                                                                | 2021 | Turkey      | 2 | 226 | 100 | 8 |
| Yazisiz V, Gocer M, Erbasan F, Ucar I, Aslan B, Oygen S, Gokalp Gok E, Terzioglu ME. Survival analysis of patients with Sjogren's syndrome in Turkey: a tertiary hospital-based study. <i>Clinical rheumatology</i> 2020; 39(1): 233-241.                                                                                                                                                                                      | 2020 | Turkey      | 4 | 372 | 47  | 8 |
| Yew J, Eow LH, Liau SM, Shantene S, Chua SH, Ng KH, Asmah M, Nadiah MN, Gun SC. Clinical audit of prevalence of pulmonary manifestations among patients with rheumatoid arthritis in Hospital Tuanku Jaafar (HTJ), Seremban, Malaysia. <i>International Journal of Rheumatic Diseases</i> 2021; 24(SUPPL 2): 225-226.                                                                                                          | 2021 | Malaysia    | 1 | 403 | 75  | 6 |
| Yiu KH, Ninaber MK, Kroft LJ, Schouffoer AA, Stolk J, Scherer HU, Meijs J, De VriesBouwstra J, Tse HF, Delgado V, Bax JJ, Huizinga TWJ, Marsan NA. Impact of pulmonary fibrosis and elevated pulmonary pressures on right ventricular function in patients with systemic sclerosis. <i>Rheumatology (United Kingdom)</i> 2016; 55(3): 504-512.                                                                                 | 2016 | Netherlands | 2 | 102 | 51  | 8 |
| Yoshida N, Okamoto M, Kaieda S, Fujimoto K, Ebata T, Tajiri M, Nakamura M, Tominaga M, Wakasugi D, Kawayama T, Kuwana M, Mimori T, Ida H, Hoshino T. Association of anti-aminoacyl-transfer RNA synthetase antibody and anti-melanoma differentiation-associated gene 5 antibody with the therapeutic response of polymyositis/dermatomyositis-associated interstitial lung disease. <i>RespirInvestig</i> 2017; 55(1): 24-32. | 2017 | Japan       | 3 | 22  | 22  | 8 |
| Young A, Vummidi D, Visovatti S, Homer K, Wilhalme H, White ES, Flaherty K, McLaughlin V, Khanna D. Prevalence, Treatment, and Outcomes of Coexistent Pulmonary Hypertension and Interstitial Lung Disease in Systemic Sclerosis. <i>Arthritis rheumatol</i> 2019; 71(8): 1339-1349.                                                                                                                                           | 2019 | USA         | 2 | 93  | 93  | 8 |



|                                                                                                                                                                                                                                                                                                                                                                                                 |      |       |   |     |     |   |
|-------------------------------------------------------------------------------------------------------------------------------------------------------------------------------------------------------------------------------------------------------------------------------------------------------------------------------------------------------------------------------------------------|------|-------|---|-----|-----|---|
| Yu M, Guo Y, Zhang P, Xue J, Yang J, Cai Q, You X, Ma J, Yang D, Jia Y, Wang Y, Li F, Chi S, Cao M, Chen J, Liu X. Increased circulating Wnt5a protein in patients with rheumatoid arthritis-associated interstitial pneumonia (RA-ILD). <i>Immunobiology</i> 2019; 224(4): 551-559.                                                                                                            | 2019 | China | 1 | 40  | 40  | 8 |
| Yuan L, Yao L, Zhao L, Xia L, Shen H, Lu J. Serum levels of soluble ST2 and interleukin-33 in patients with dermatomyositis and polymyositis. <i>ClinExpRheumatol</i> 2013; 31(3): 428-432.                                                                                                                                                                                                     | 2013 | China | 3 | 70  | 35  | 6 |
| Yunt ZX, Chung JH, Hobbs S, Fernandez-Perez ER, Olson AL, Huie TJ, Keith RC, Janssen WJ, Goldstein BL, Lynch DA, Brown KK, Swigris JJ, Solomon JJ. High resolution computed tomography pattern of usual interstitial pneumonia in rheumatoid arthritis-associated interstitial lung disease: Relationship to survival. <i>Respiratory medicine</i> 2017; 126(Journal Article): 100-104.         | 2017 | USA   | 1 | 158 | 158 | 8 |
| Yura H, Sakamoto N, Satoh M, Ishimoto H, Hanaka T, Ito C, Hasegawa T, Tanaka S, Miyamura T, Nakashima S, Hara A, Kakugawa T, Oda K, Kido T, Obase Y, Ishimatsu Y, Yatera K, Kawakami A, Mukae H. Clinical characteristics of patients with anti-aminoacyl-tRNA synthetase antibody positive idiopathic interstitial pneumonia. <i>Respiratory medicine</i> 2017; 132(Journal Article): 189-194. | 2017 | Japan | 3 | 20  | 20  | 8 |
| Zamarron-de Lucas E, Gomez Carrera L, Bonilla G, Petit D, Mangas A, Alvarez-Sala R. Antisynthetase syndrome: Analysis of 11 cases. <i>MedClin(Barc)</i> 2017; 148(4): 166-169.                                                                                                                                                                                                                  | 2017 | Spain | 3 | 11  | 11  | 6 |
| Zamora AC, Hoskote SS, Abascal-Bolado B, White D, Cox CW, Ryu JH, Moua T. Clinical features and outcomes of interstitial lung disease in anti-Jo-1 positive antisynthetase syndrome. <i>Respiratory medicine</i> 2016; 118(Journal Article): 39-45.                                                                                                                                             | 2016 | USA   | 3 | 103 | 103 | 8 |

|                                                                                                                                                                                                                                                                                                                                                                                                |      |       |                  |      |     |   |
|------------------------------------------------------------------------------------------------------------------------------------------------------------------------------------------------------------------------------------------------------------------------------------------------------------------------------------------------------------------------------------------------|------|-------|------------------|------|-----|---|
| Zamora-Legoff JA, Krause ML, Crowson CS, Ryu JH, Matteson EL. Patterns of interstitial lung disease and mortality in rheumatoid arthritis. <i>Rheumatology</i> 2017; 56(3): 344-350.                                                                                                                                                                                                           | 2017 | USA   | 1                | 181  | 181 | 8 |
| Zanatta E, Guarnieri G, Pigatto E, Rizzo M, Campana C, Riato L, Maestrelli P, Cozzi F. Nitric oxide diffusion in patients with SSc. In; 2012 2012: (var.pagings). 51 (SUPPL. 2) (pp ii104); Oxford University Press; 2012.                                                                                                                                                                     | 2012 | Italy | 2                | 37   | 12  | 8 |
| Zanatta E, Martini A, Scarpieri E, Biasiolo A, Ortolan A, Benvenuti F, Cozzi F, Pontisso P, Doria A. Squamous cell carcinoma antigen-IgM (SCCA-IgM) is associated with interstitial lung disease in systemic sclerosis. <i>Joint, Bone, Spine: Revue du Rhumatisme</i> 2020(Journal Article).                                                                                                  | 2020 | Italy | 2                | 97   | 41  | 8 |
| Zhang G, Zhang X, Liu Q, Zhao Z, Lin H, Wu C. Correlation between imaging features of high-resolution computed tomography and histopathology of connective tissue diseases associated interstitial lung disease in Chinese Population. In; 2016 2016: 18th Asia Pacific League of Associations for Rheumatology Congress, APLAR. China. 19 (Supplement 2) (pp 94); Blackwell Publishing; 2016. | 2016 | China | 1, 2, 3, 4, 5, 6 | 2320 | 325 | 8 |
| Zhang R, Sun T, Song L, Zuo D, Xiao W. Increased levels of serum galectin-3 in patients with primary Sjogren's syndrome: associated with interstitial lung disease. <i>Cytokine</i> 2014; 69(2): 289-293.                                                                                                                                                                                      | 2014 | China | 4                | 87   | 56  | 7 |
| Zhang S, Shen H, Shu X, Peng Q, Wang G. Abnormally increased low-density granulocytes in peripheral blood mononuclear cells are associated with interstitial lung disease in dermatomyositis. <i>Modern Rheumatology</i> 2017; 27(1): 122-129.                                                                                                                                                 | 2017 | China | 3                | 48   | 28  | 7 |
| Zhang T, Yuan F, Xu L, Sun W, Liu L, Xue J. Characteristics of patients with primary Sjogren's syndrome associated interstitial lung disease and relevant features of disease progression. <i>Clinical rheumatology</i> 2020(Journal Article).                                                                                                                                                 | 2020 | China | 4                | 170  | 85  | 8 |

|                                                                                                                                                                                                                                                                                                                                                    |      |         |   |      |     |   |
|----------------------------------------------------------------------------------------------------------------------------------------------------------------------------------------------------------------------------------------------------------------------------------------------------------------------------------------------------|------|---------|---|------|-----|---|
| Zhang T, Zhang J, Liu X, Zhang L, Zhao D, Wu X, Xu H. A clinical analysis of prognostic factors for dermatomyositis-associated interstitial lung disease. <i>International Journal of Clinical and Experimental Medicine</i> 2018; 11(6) (pp 5903-5911): Arte-Number: JEM0066897. ate of Pubaton: 0066830 Jun 0062018.                             | 2018 | China   | 3 | 103  | 103 | 8 |
| Zhang Y, Li H, Wu N, Dong X, Zheng Y. Retrospective study of the clinical characteristics and risk factors of rheumatoid arthritis-associated interstitial lung disease. <i>Clinical rheumatology</i> 2017; 36(4): 817-823.                                                                                                                        | 2017 | China   | 1 | 550  | 237 | 7 |
| Zhao J, Liu Z, Wang Q, Xu D, Li M, Zeng X. The risk factors and prognosis of primary Sjogren's syndrome-associated interstitial lung disease: A multi-centered cohort study. In; 2019 2019: 21st Asia Pacific League of Associations for Rheumatology Congress, APLAR 2019. Australia. 22 (Supplement 3) (pp 224-225); Blackwell Publishing; 2019. | 2019 | China   | 4 | 1501 | 258 | 6 |
| Zhao L, Yao L, Yuan L, Xia L, Shen H, Lu J. Potential contribution of interleukin-33 to the development of interstitial lung disease in patients with primary Sjogren's Syndrome. <i>Cytokine</i> 2013; 64(1): 22-24.                                                                                                                              | 2013 | China   | 4 | 110  | 54  | 6 |
| Zhou M, Jiang L, Nie L, Chen T, Zhang T, Sun W, Sutikno J, Du Y, Xue J. Myopathy is a Risk Factor for Poor Prognosis of Patients with Systemic Sclerosis: A retrospective cohort study. <i>Medicine (Baltimore)</i> 2020; 99(33): e21734.                                                                                                          | 2020 | China   | 2 | 204  | 129 | 8 |
| Zoto A, Hafizi H, Backa T, Petrela E, Zaimi M, Harxhi A, Osmenaj R, Ylli Z. Pulmonary involvement in scleroderma. In; 2013 2013: (var.pagings). 16 (SUPPL. 1) (pp 96); Blackwell Publishing; 2013.                                                                                                                                                 | 2013 | Albania | 2 | 58   | 42  | 7 |
| Zuo Y, Ye L, Liu M, Li S, Liu W, Chen F, Lu X, Gordon P, Wang G, Shu X. Clinical significance of radiological patterns of HRCT and their association with macrophage activation in dermatomyositis. <i>Rheumatology</i> 2020(Journal Article).                                                                                                     | 2020 | China   | 3 | 165  | 165 | 8 |

**Table S5** Pooled prevalence of ILD CT patterns, by connective tissue disease. Data shown are pooled percent (95% confidence interval). Heterogeneity is displayed as  $I^2$  statistic and  $p$  value.

| CTD  | Total N | UIP                                                | NSIP                                              | OP                                               | LIP                                             | Other                                             | Non UIP                                           |
|------|---------|----------------------------------------------------|---------------------------------------------------|--------------------------------------------------|-------------------------------------------------|---------------------------------------------------|---------------------------------------------------|
| RA   | 4897    | <b>46 (42-50)</b><br>$I^2 = 88.7\%$<br>$p = 0.00$  | <b>35 (31-40)</b><br>$I^2 = 84.1\%$<br>$p = 0.00$ | <b>4 (3-6)</b><br>$I^2 = 60.9\%$<br>$p = 0.00$   |                                                 | <b>17 (12-23)</b><br>$I^2 = 95.3\%$<br>$p = 0.00$ |                                                   |
| SSc  | 1263    | <b>19 (15-24)</b><br>$I^2 = 72.3\%$<br>$p = 0.00$  | <b>76 (70-82)</b><br>$I^2 = 80.6\%$<br>$p = 0.00$ |                                                  |                                                 | <b>4 (1-7)</b><br>$I^2 = 81.1\%$<br>$p = 0.00$    |                                                   |
| IIM  | 1305    | <b>8 (4-13)</b><br>$I^2 = 86.6\%$<br>$p = 0.00$    | <b>59 (52-67)</b><br>$I^2 = 83.3\%$<br>$p = 0.00$ | <b>16 (9-25)</b><br>$I^2 = 91.2\%$<br>$p = 0.00$ |                                                 | <b>13 (7-21)</b><br>$I^2 = 91.3\%$<br>$p = 0.00$  |                                                   |
| pSS  | 722     | <b>28 (15-43)</b><br>$I^2 = 91.3\%$<br>$p = 0.00$  | <b>49 (39-59)</b><br>$I^2 = 81.0\%$<br>$p = 0.00$ | <b>3 (1-6)</b><br>$I^2 = 27.6\%$<br>$p = 0.17$   | <b>7 (2-15)</b><br>$I^2 = 78.2\%$<br>$p = 0.00$ | <b>5 (0-15)</b><br>$I^2 = 90.2\%$<br>$p = 0.00$   |                                                   |
| MCTD | 52      | <b>6 (1-16)</b><br>$I^2 = 0.0\%$<br>$p = 0.41$     | <b>70 (50-87)</b><br>$I^2 = 48.2\%$<br>$p = 0.15$ |                                                  |                                                 | <b>21 (5-44)</b><br>$I^2 = 63.0\%$<br>$p = 0.07$  |                                                   |
| SLE  | 93      | <b>9 (1-20)</b><br>$I^2 = 51.1\%$<br>$p = 0.13$    | <b>27 (12-45)</b><br>$I^2 = 45.2\%$<br>$p = 0.14$ |                                                  |                                                 | <b>49 (31-67)</b><br>$I^2 = 60.7\%$<br>$p = 0.08$ |                                                   |
| UCTD | 91      | <b>37 (20-55)</b><br>$I^2 = 67.0\%$<br>$p = 0.048$ |                                                   |                                                  |                                                 |                                                   | <b>63 (45-80)</b><br>$I^2 = 61.4\%$<br>$p = 0.08$ |

Abbreviations: CT: computed tomography CTD: connective tissue disease, RA: rheumatoid arthritis, SSc: systemic sclerosis, IIM: idiopathic inflammatory myositis, ILD: interstitial lung disease, LIP: lymphocytic interstitial pneumonia, MCTD: mixed connective tissue disease, NSIP: non-specific interstitial pneumonia, OP: organizing pneumonia, Other: other and undifferentiated, pSS: primary Sjögren syndrome, SLE: systemic lupus erythematosus, UCTD: undifferentiated connective tissue disease, UIP: usual interstitial pneumonia.
